# Supplementary material for: Cognitive behavioural therapy for the treatment of schizophrenia spectrum disorders: an umbrella review of meta-analyses of randomised controlled trials
Source: PubMed Central journal article supplement (PMC10809079; doi:10.1016/j.eclinm.2023.102392), 2024-01-05
Supplement: mmc1.pdf [file mmc1.pdf]

## **Supplement**

### **Content of supplementary material**

|                                                                                                 |           |
|-------------------------------------------------------------------------------------------------|-----------|
| <b>Supplemental 1. Search strategy</b>                                                          | <b>1</b>  |
| <b>Supplemental 2. List of included meta-analyses</b>                                           | <b>2</b>  |
| <b>Supplemental 3. List of meta-analyses providing sufficient data for statistical analysis</b> | <b>3</b>  |
| <b>Supplemental 4. Operationalization of each AMSTAR-2 items</b>                                | <b>4</b>  |
| <b>Supplemental Table 1. List of excluded studies, based on full-text evaluation</b>            | <b>7</b>  |
| <b>Supplemental Table 2. Non-analyzable data primary outcome</b>                                | <b>11</b> |
| <b>Supplemental Table 3. Non-analyzable data secondary outcome</b>                              | <b>15</b> |
| <b>Supplemental Table 4. Sensitivity analysis</b>                                               | <b>19</b> |
| <b>Supplemental Table 5. The number of times randomized trials were included</b>                | <b>21</b> |
| <b>Supplemental figures 1-34. Forest plots for each outcome per follow-up assessment</b>        | <b>27</b> |

## Supplement 1. Search strategy

### Medline

((meta-analysis[Title/Abstract])) AND ((schizo\*) OR ("Schizophrenia Spectrum and Other Psychotic Disorders"[MeSH Terms]) OR (psychosis)) AND ((cogniti\* AND (behavio\* OR therap\*)) OR (CBT)))

### Embase

'meta analysis':ti,ab,kw AND ('schizophrenia spectrum disorder'/exp OR 'psychosis'/exp OR 'schizophrenia'/exp OR 'psycho') AND ('cognitive therapy' OR 'behavioral therapy' OR 'behavior therapy' OR 'cbt' OR 'behavioural therapy' OR 'behaviour therapy')

### PsychInfo

AB ( meta-analysis or meta analysis ) AND TX ( schizophrenia or psychosis or psychoses or psychotic disorder or schizophrenic disorder ) AND TX ( cbt or cognitive therapy or behavior therapy or behaviour therapy or behavioral therapy or cognitive behavior therapy )

### Cochrane

MeSH descriptor: [Schizophrenia Spectrum and Other Psychotic Disorders] explode all trees AND (cogniti\* NEXT (behavior\* OR therap\*)) (with filter only systematic reviews)

## Supplement 2. List of included meta-analyses(1-26)

1. Jones C, Hacker D, Xia J, Meaden A, Irving CB, Zhao S, et al. Cognitive behavioural therapy plus standard care versus standard care for people with schizophrenia. *Cochrane Database Syst Rev.* 2018;12(12):Cd007964.
2. Jones C, Hacker D, Meaden A, Cormac I, Irving CB, Xia J, et al. Cognitive behavioural therapy plus standard care versus standard care plus other psychosocial treatments for people with schizophrenia. *Cochrane Database Syst Rev.* 2018;11(11):CD008712.
3. Barnicot K, Michael C, Trione E, Lang S, Saunders T, Sharp M, et al. Psychological interventions for acute psychiatric inpatients with schizophrenia-spectrum disorders: A systematic review and meta-analysis. *Clin Psychol Rev.* 2020;82:101929.
4. Turner DT, van der Gaag M, Karyotaki E, Cuijpers P. Psychological interventions for psychosis: a meta-analysis of comparative outcome studies. *Am J Psychiatry.* 2014;171(5):523-38.
5. Bighelli I, Rodolico A, García-Mieres H, Pitschel-Walz G, Hansen WP, Schneider-Thoma J, et al. Psychosocial and psychological interventions for relapse prevention in schizophrenia: a systematic review and network meta-analysis. *Lancet Psychiatry.* 2021;8(11):969-80.
6. Bighelli I, Salanti G, Huhn M, Schneider-Thoma J, Krause M, Reitmeir C, et al. Psychological interventions to reduce positive symptoms in schizophrenia: systematic review and network meta-analysis. *World psychiatry : official journal of the World Psychiatric Association (WPA).* 2018;17(3):316-29.
7. Burns AM, Erickson DH, Brenner CA. Cognitive-behavioral therapy for medication-resistant psychosis: a meta-analytic review. *Psychiatric services (Washington, DC).* 2014;65(7):874-80.
8. Jauhar S, McKenna PJ, Radua J, Fung E, Salvador R, Laws KR. Cognitive-behavioural therapy for the symptoms of schizophrenia: systematic review and meta-analysis with examination of potential bias. *The British journal of psychiatry : the journal of mental science.* 2014;204(1):20-9.
9. Kennedy L, Xyrichis A. Cognitive Behavioral Therapy Compared with Non-specialized Therapy for Alleviating the Effect of Auditory Hallucinations in People with Reoccurring Schizophrenia: A Systematic Review and Meta-analysis. *Community Ment Health J.* 2017;53(2):127-33.
10. Laws KR, Darlington N, Kondel TK, McKenna PJ, Jauhar S. Cognitive Behavioural Therapy for schizophrenia - outcomes for functioning, distress and quality of life: a meta-analysis. *BMC Psychol.* 2018;6(1):32.
11. Lincoln TM, Suttner C, Nestoriuc Y. Wirksamkeit kognitiver interventionen für schizophrenie. *Psychologische Rundschau*2008.
12. Lutgens D, Garipey G, Malla A. Psychological and psychosocial interventions for negative symptoms in psychosis: systematic review and meta-analysis. *The British journal of psychiatry : the journal of mental science.* 2017;210(5):324-32.
13. Lynch D, Laws KR, McKenna PJ. Cognitive behavioural therapy for major psychiatric disorder: does it really work? A meta-analytical review of well-controlled trials. *Psychological medicine.* 2010;40(1):9-24.
14. Mc Glanaghy E, Turner D, Davis GA, Sharpe H, Dougall N, Morris P, et al. A network meta-analysis of psychological interventions for schizophrenia and psychosis: Impact on symptoms. *Schizophrenia research.* 2021;228:447-59.

15. Mehl S, Werner D, Lincoln TM. Does Cognitive Behavior Therapy for psychosis (CBTp) show a sustainable effect on delusions? A meta-analysis. *Front Psychol*. 2015;6:1450.
16. Naeem F, Khoury B, Munshi T, Ayub M, Lecomte T, Kingdon D, et al. Brief Cognitive Behavioral Therapy for Psychosis (CBTp) for Schizophrenia: Literature Review and Meta-analysis. *International Journal of Cognitive Therapy* 2016.
17. Newton-Howes G, Wood R. Cognitive behavioural therapy and the psychopathology of schizophrenia: systematic review and meta-analysis. *Psychol Psychother*. 2013;86(2):127-38.
18. Pilling S, Bebbington P, Kuipers E, Garety P, Geddes J, Orbach G, et al. Psychological treatments in schizophrenia: I. Meta-analysis of family intervention and cognitive behaviour therapy. *Psychological medicine*. 2002;32(5):763-82.
19. Sarin F, Wallin L, Widerlöv B. Cognitive behavior therapy for schizophrenia: a meta-analytical review of randomized controlled trials. *Nord J Psychiatry*. 2011;65(3):162-74.
20. Todorovic A, Lal S, Dark F, De Monte V, Kisely S, Siskind D. CBTp for people with treatment refractory schizophrenia on clozapine: a systematic review and meta-analysis. *J Ment Health*. 2020:1-8.
21. Turner DT, Burger S, Smit F, Valmaggia LR, van der Gaag M. What Constitutes Sufficient Evidence for Case Formulation-Driven CBT for Psychosis? Cumulative Meta-analysis of the Effect on Hallucinations and Delusions. *Schizophrenia bulletin*. 2020;46(5):1072-85.
22. Turner DT, Reijnders M, van der Gaag M, Karyotaki E, Valmaggia LR, Moritz S, et al. Efficacy and Moderators of Cognitive Behavioural Therapy for Psychosis Versus Other Psychological Interventions: An Individual-Participant Data Meta-Analysis. *Front Psychiatry*. 2020;11:402.
23. Wykes T, Steel C, Everitt B, Tarrier N. Cognitive behavior therapy for schizophrenia: effect sizes, clinical models, and methodological rigor. *Schizophrenia bulletin*. 2008;34(3):523-37.
24. Velthorst E, Koeter M, van der Gaag M, Nieman DH, Fett AK, Smit F, et al. Adapted cognitive-behavioural therapy required for targeting negative symptoms in schizophrenia: meta-analysis and meta-regression. *Psychological medicine*. 2015;45(3):453-65.
25. van der Gaag M, Valmaggia LR, Smit F. The effects of individually tailored formulation-based cognitive behavioural therapy in auditory hallucinations and delusions: a meta-analysis. *Schizophrenia research*. 2014;156(1):30-7.
26. Bighelli IW, S., Reitmeir C, Schwermann F, Salahuddin N, Leucht S. Effects of psychological treatments on functioning in people with Schizophrenia: a systematic review and meta-analysis of randomized controlled trials. *Eur Arch Psychiatry Clin Neurosci*; 2023.

### **Supplemental 3. List of meta-analyses providing sufficient data for statistical analysis.**

1. Jauhar S, McKenna PJ, Radua J, Fung E, Salvador R, Laws KR. Cognitive-behavioural therapy for the symptoms of schizophrenia: systematic review and meta-analysis with examination of potential bias. *The British journal of psychiatry : the journal of mental science*. 2014;204(1):20-9.
2. Jones C, Hacker D, Meaden A, Cormac I, Irving CB, Xia J, et al. Cognitive behavioural therapy plus standard care versus standard care plus other psychosocial treatments for people with schizophrenia. *Cochrane Database Syst Rev*. 2018;11(11):CD008712.
3. Jones C, Hacker D, Xia J, Meaden A, Irving CB, Zhao S, et al. Cognitive behavioural therapy plus standard care versus standard care for people with schizophrenia. *Cochrane Database Syst Rev*. 2018;12(12):Cd007964.
4. Todorovic A, Lal S, Dark F, De Monte V, Kisely S, Siskind D. CBTp for people with treatment refractory schizophrenia on clozapine: a systematic review and meta-analysis. *J Ment Health*. 2020:1-8.
5. Barnicot K, Michael C, Trione E, Lang S, Saunders T, Sharp M, et al. Psychological interventions for acute psychiatric inpatients with schizophrenia-spectrum disorders: A systematic review and meta-analysis. *Clin Psychol Rev*. 2020;82:101929.
6. Newton-Howes G, Wood R. Cognitive behavioural therapy and the psychopathology of schizophrenia: systematic review and meta-analysis. *Psychol Psychother*. 2013;86(2):127-38.
7. Lynch D, Laws KR, McKenna PJ. Cognitive behavioural therapy for major psychiatric disorder: does it really work? A meta-analytical review of well-controlled trials. *Psychological medicine*. 2010;40(1):9-24.
8. Bighelli I, Salanti G, Huhn M, Schneider-Thoma J, Krause M, Reitmeir C, et al. Psychological interventions to reduce positive symptoms in schizophrenia: systematic review and network meta-analysis. *World psychiatry : official journal of the World Psychiatric Association (WPA)*. 2018;17(3):316-29.
9. Lutgens D, Garipey G, Malla A. Psychological and psychosocial interventions for negative symptoms in psychosis: systematic review and meta-analysis. *The British journal of psychiatry : the journal of mental science*. 2017;210(5):324-32.
10. Turner DT, Reijnders M, van der Gaag M, Karyotaki E, Valmaggia LR, Moritz S, et al. Efficacy and

Moderators of Cognitive Behavioural Therapy for Psychosis Versus Other Psychological Interventions: An Individual-Participant Data Meta-Analysis. *Front Psychiatry*. 2020;11:402.

11. Velthorst E, Koeter M, van der Gaag M, Nieman DH, Fett AK, Smit F, et al. Adapted cognitive-behavioural therapy required for targeting negative symptoms in schizophrenia: meta-analysis and meta-regression. *Psychological medicine*. 2015;45(3):453-65.
12. Turner DT, Burger S, Smit F, Valmaggia LR, van der Gaag M. What Constitutes Sufficient Evidence for Case Formulation-Driven CBT for Psychosis? Cumulative Meta-analysis of the Effect on Hallucinations and Delusions. *Schizophrenia bulletin*. 2020;46(5):1072-85.
13. Mehl S, Werner D, Lincoln TM. Does Cognitive Behavior Therapy for psychosis (CBTp) show a sustainable effect on delusions? A meta-analysis. *Front Psychol*. 2015;6:1450.
14. van der Gaag M, Valmaggia LR, Smit F. The effects of individually tailored formulation-based cognitive behavioural therapy in auditory hallucinations and delusions: a meta-analysis. *Schizophrenia research*. 2014;156(1):30-7.
15. Laws KR, Darlington N, Kondel TK, McKenna PJ, Jauhar S. Cognitive Behavioural Therapy for schizophrenia - outcomes for functioning, distress and quality of life: a meta-analysis. *BMC Psychol*. 2018;6(1):32.
16. Bighelli IW, S., Reitmeir C, Schwermann F, Salahuddin N, Leucht S. Effects of psychological treatments on functioning in people with Schizophrenia: a systematic review and meta-analysis of randomized controlled trials. *Eur Arch Psychiatry Clin Neurosci*; 2023.

#### **Supplemental 4. Operationalization of each AMSTAR-2 items, adopted from Shea et al. 2017.**

Item 1: Did the research questions and inclusion criteria for the review include the components of Problem Intervention Control and Outcome (PICO)?

For Yes: appraisers should be confident that the four elements of PICO are described somewhere in the report.

For No: any element of the PICO is missing in the report.

Item 2: Did the report of the review contain an explicit statement that the review methods were established prior to conduct of the review and did the report justify any significant deviations from the protocol?

For Partial Yes: The authors state that they had a written protocol or guide that included all the following: review question(s), a search strategy, inclusion/exclusion criteria, a risk of bias assessment.

For Yes: authors should demonstrate that they have worked with a written protocol with independent verification (by a registration independent body, e.g. research ethics board or research office) before the review was undertaken. In addition, the protocol should be registered and should also have specified: a meta-analysis/synthesis plan, if appropriate, and, a plan for investigating causes of heterogeneity, justification for any deviations from the protocol.

For No: if any of the above mentioned elements are missing.

Item 3. Did the review authors explain their selection of the study designs for inclusion in the review?

For Yes: the review should satisfy one of the following elements: explanation for including only randomized controlled trial (RCTs).

For No: if the abovementioned elements are missing.

Item 4. Did the review authors use a comprehensive literature search strategy?

Partial Yes: all the following should be completed: searched at least 2 databases (relevant to research question), provided key word and/or search strategy, justified publication restrictions (e.g. language).

For Yes: in addition to all elements of partial yes, all the following has to be completed too: searched the reference lists / bibliographies of included studies. searched trial/study registries, included/consulted content experts in the field, if relevant, searched for grey literature, conducted search within 24 months of completion of the review

For No: the abovementioned is missing.

Item 5. Did the review authors perform study selection in duplicate?

For Yes: either one of the following: at least two reviewers independently agreed on selection of eligible studies and achieved consensus on which studies to include, or two reviewers selected a sample of eligible studies and achieved good agreement (at least 80 percent), with the remainder selected by one reviewer.

For No: the abovementioned is missing.

Item 6. Did the review authors perform data extraction in duplicate?

For Yes, either one of the following: at least two reviewers achieved consensus on which data to extract from included studies, or two reviewers extracted data from a sample of eligible studies and achieved good agreement (at least 80 percent), with the remainder extracted by one reviewer.

For No: the abovementioned elements are missing.

Item 7. Did the review authors provide a list of excluded studies and justify the exclusions?

For Partial Yes: provided a list of all potentially relevant studies that were read in full-text form but excluded from the review.

For Yes, must also have justified the exclusion from the review of each potentially relevant study.

For No: the abovementioned elements are missing.

Item 8. Did the review authors describe the included studies in adequate detail?

For Partial Yes (all the following): described populations, described interventions, described comparators, described outcomes, described research designs.

For Yes, should also have all the following: described population in detail, described intervention in detail (including doses if relevant), described comparator in detail (including doses if relevant), described study's setting, timeframe for follow-up.

For No: the abovementioned elements are missing.

Item 9. Did the review authors use a satisfactory technique for assessing the risk of bias (RoB) in individual studies that were included in the review?

For Partial Yes, must have assessed RoB from unconcealed allocation, and lack of blinding of patients and assessors when assessing outcomes (unnecessary for objective outcomes such as all-cause mortality).

For Yes, must also have assessed RoB from allocation sequence that was not truly random, and selection of the reported result from among multiple measurements or analyses of a specified outcome.

For No: the abovementioned elements are missing.

Item 10. Did the review authors report on the sources of funding for the studies included in the review?

For Yes: must have reported on the sources of funding for individual studies included in the review. Note: Reporting that the reviewers searched this information but it was not reported by study authors also qualifies.

For No: the abovementioned elements are missing.

Item 11. If meta-analysis was performed did the review authors use appropriate methods for statistical combination of results?

For Yes: the authors justified combining the data in a meta-analysis and, they used an appropriate weighted technique to combine study results and adjusted for heterogeneity if present. And investigated the causes of any heterogeneity.

For No: the abovementioned elements are missing.

Item 12. If meta-analysis was performed, did the review authors assess the potential impact of RoB in individual studies on the results of the meta-analysis or other evidence synthesis?

For Yes: included only low risk of bias RCTs or, if the pooled estimate was based on RCTs at variable RoB, the authors performed analyses to investigate possible impact of RoB on summary estimates of effect.

For no: the abovementioned elements are missing.

Item 13. Did the review authors account for RoB in individual studies when interpreting/ discussing the results of the review?

For Yes: included only low risk of bias RCTs or if RCTs with moderate or high RoB, and provided a discussion of the likely impact of RoB on the results.

For No: the abovementioned elements are missing.

Item 14. Did the review authors provide a satisfactory explanation for, and discussion of, any heterogeneity observed in the results of the review?

For Yes: there was no significant heterogeneity in the results or if heterogeneity was present the authors performed an investigation of sources of any heterogeneity in the results and discussed the impact of this on the results of the review.

For No: the abovementioned elements are missing.

Item 15. If they performed quantitative synthesis did the review authors carry out an adequate investigation of publication bias (small study bias) and discuss its likely impact on the results of the review?

For Yes: performed graphical or statistical tests for publication bias and discussed the likelihood and magnitude of impact of publication bias.

For No: the abovementioned elements are missing.

Or: no meta-analysis was performed.

Item 16. Did the review authors report any potential sources of conflict of interest, including any funding they received for conducting the review?

For Yes: the authors reported no competing interests or the authors described their funding sources and how they managed potential conflicts of interest.

For No: the abovementioned elements are missing.

**Supplemental Table 1. List of excluded studies, based on full-text evaluation.**

|                                                                                                                                                                                                                                                                                                                  | Reason                   |
|------------------------------------------------------------------------------------------------------------------------------------------------------------------------------------------------------------------------------------------------------------------------------------------------------------------|--------------------------|
| Allott K, van-der-El K, Bryce S, Parrish EM, McGurk SR, Hetrick S, et al. Compensatory Interventions for Cognitive Impairments in Psychosis: A Systematic Review and Meta-Analysis. <i>Schizophrenia bulletin</i> . 2020;46(4):869-83.                                                                           | Wrong intervention       |
| Alvarez-Jiménez M, Parker AG, Hetrick SE, McGorry PD, Gleeson JF. Preventing the second episode: a systematic review and meta-analysis of psychosocial and pharmacological trials in first-episode psychosis. <i>Schizophrenia bulletin</i> . 2011;37(3):619-30.                                                 | Wrong intervention       |
| Bighelli I, Huhn M, Schneider-Thoma J, Krause M, Reitmeir C, Wallis S, et al. Response rates in patients with schizophrenia and positive symptoms receiving cognitive behavioural therapy: a systematic review and single-group meta-analysis. <i>BMC Psychiatry</i> . 2018;18(1):380.                           | No meta-analysis of RCTs |
| Bighelli I, Leucht S. Psychological interventions for positive symptoms in schizophrenia: A network meta-analysis. <i>Schizophr Bull</i> . 2018;44:S305.                                                                                                                                                         | No meta-analysis of RCTs |
| Brand RM, McEnery C, Rossell S, Bendall S, Thomas N. Do trauma-focussed psychological interventions have an effect on psychotic symptoms? A systematic review and meta-analysis. <i>Schizophr Res</i> . 2018;195:13-22.                                                                                          | Wrong intervention       |
| Broderick J, Knowles A, Chadwick J, Vancampfort D. Yoga versus standard care for schizophrenia. <i>Cochrane Database of Systematic Reviews</i> . 2015(10).                                                                                                                                                       | Wrong intervention       |
| Burlingame GM, Svien H, Hoppe L, Hunt I, Rosendahl J. Group therapy for schizophrenia: A meta-analysis. <i>Psychotherapy (Chic)</i> . 2020;57(2):219-36.                                                                                                                                                         | Wrong intervention       |
| Burns T. Psychosocial interventions. <i>CURR OPIN PSYCHIATRY</i> . 1997;10(1):36-9.                                                                                                                                                                                                                              | No meta-analysis of RCTs |
| Cella M, Preti A, Edwards C, Dow T, Wykes T. Cognitive remediation for negative symptoms of schizophrenia: A network meta-analysis. <i>Clinical psychology review</i> . 2017;52:43-51.                                                                                                                           | Wrong intervention       |
| d'Arma A, Isernia S, Di Tella S, Rovaris M, Valle A, Baglio F, et al. Social Cognition Training for Enhancing Affective and Cognitive Theory of Mind in Schizophrenia: A Systematic Review and a Meta-Analysis. <i>J Psychol</i> . 2021;155(1):26-58.                                                            | Wrong intervention       |
| Dauwan M, Begemann MJ, Heringa SM, Sommer IE. Exercise Improves Clinical Symptoms, Quality of Life, Global Functioning, and Depression in Schizophrenia: A Systematic Review and Meta-analysis. <i>Schizophrenia bulletin</i> . 2016;42(3):588-99.                                                               | Wrong intervention       |
| Dauwan M, Begemann MJH, Slot MIE, Lee EHM, Scheltens P, Sommer IEC. Physical exercise improves quality of life, depressive symptoms, and cognition across chronic brain disorders: a transdiagnostic systematic review and meta-analysis of randomized controlled trials. <i>J Neurol</i> . 2021;268(4):1222-46. | Wrong intervention       |
| Dilk MN, Bond GR. Meta-analytic evaluation of skills training research for individuals with severe mental illness. <i>J CONSULT CLIN PSYCHOL</i> . 1996;64(6):1337-46.                                                                                                                                           | Wrong diagnosis          |
| Ducasse D, Fond G. [Acceptance and commitment therapy]. <i>Encephale</i> . 2015;41(1):1-9.                                                                                                                                                                                                                       | No meta-analysis of RCTs |
| Eichner C, Berna F. Acceptance and efficacy of Metacognitive Training (MCT) on positive symptoms and delusions in patients with schizophrenia: A meta-analysis taking into account important moderators. <i>Schizophrenia Bulletin</i> . 2016;42(4):952-62.                                                      | Wrong intervention       |
| Firth J, Cotter J, Elliott R, French P, Yung AR. A systematic review and meta-analysis of exercise interventions in schizophrenia patients. <i>Psychological medicine</i> . 2015;45(7):1343-61.                                                                                                                  | Wrong intervention       |
| Gottdiener WH. The benefits of individual psychotherapy for schizophrenic patients: A meta-analytic review of the psychotherapy outcome literature: ProQuest Information & Learning; 2001.                                                                                                                       | No meta-analysis of RCTs |
| Gray R, Bressington D, Ivanecka A, Hardy S, Jones M, Schulz M, et al. Is adherence therapy an effective adjunct treatment for patients with schizophrenia spectrum disorders? A systematic review and meta-analysis. <i>BMC Psychiatry</i> . 2016;16(1).                                                         | Wrong intervention       |

|                                                                                                                                                                                                                                                                                                                  |                          |
|------------------------------------------------------------------------------------------------------------------------------------------------------------------------------------------------------------------------------------------------------------------------------------------------------------------|--------------------------|
| Grynszpan O, Perbal S, Pelissolo A, Fossati P, Jouvent R, Dubal S, et al. Efficacy and specificity of computer-assisted cognitive remediation in schizophrenia: A meta-analytical study. <i>Psychological Medicine</i> . 2011;41(1):163-73.                                                                      | Wrong intervention       |
| Hazell CM, Hayward M, Cavanagh K, Strauss C. A systematic review and meta-analysis of low intensity CBT for psychosis. <i>Clin Psychol Rev</i> . 2016;45:183-92.                                                                                                                                                 | No meta-analysis of RCTs |
| Kambeitz-Ilankovic L, Betz LT, Dominke C, Haas SS, Subramaniam K, Fisher M, et al. Multi-outcome meta-analysis (MOMA) of cognitive remediation in schizophrenia: Revisiting the relevance of human coaching and elucidating interplay between multiple outcomes. <i>Neurosci Biobehav Rev</i> . 2019;107:828-45. | Wrong intervention       |
| Kingdon D, Turkington D. Cognitive therapy of psychosis: Research and implementation. <i>Schizophr Res</i> . 2019;203:62-5.                                                                                                                                                                                      | No meta-analysis of RCTs |
| Krabbendam L, Aleman A. Cognitive rehabilitation in schizophrenia: A quantitative analysis of controlled studies. <i>Psychopharmacology (Berl)</i> . 2003;169(3):376-82.                                                                                                                                         | Wrong intervention       |
| Kurtz MM. Cognitive remediation for schizophrenia: Current status, biological correlates and predictors of response. <i>Expert Rev Neurother</i> . 2012;12(7):813-21.                                                                                                                                            | Wrong intervention       |
| Kurtz MM, Richardson CL. Social cognitive training for schizophrenia: a meta-analytic investigation of controlled research. <i>Schizophrenia bulletin</i> . 2012;38(5):1092-104.                                                                                                                                 | Wrong intervention       |
| Leichsenring F, Rabung S. Effectiveness of long-term psychodynamic psychotherapy: A meta-analysis. <i>J Am Med Assoc</i> . 2008;300(13):1551-65.                                                                                                                                                                 | Wrong diagnosis          |
| Lejeune JA, Northrop A, Kurtz MM. A Meta-analysis of Cognitive Remediation for Schizophrenia: Efficacy and the Role of Participant and Treatment Factors. <i>Schizophrenia bulletin</i> . 2021;47(4):997-1006.                                                                                                   | Wrong intervention       |
| Liu YC, Tang CC, Hung TT, Tsai PC, Lin MF. The Efficacy of Metacognitive Training for Delusions in Patients With Schizophrenia: A Meta-Analysis of Randomized Controlled Trials Informs Evidence-Based Practice. <i>Worldviews Evid Based Nurs</i> . 2018;15(2):130-9.                                           | Wrong intervention       |
| Lopez-Morinigo J-D, Ajnakina O, Martínez AS-E, Escobedo-Aedo P-J, Ruiz-Ruano VG, Sánchez-Alonso S, et al. Can metacognitive interventions improve insight in schizophrenia spectrum disorders? A systematic review and meta-analysis. <i>Psychological Medicine</i> . 2020;50(14):2289-301.                      | Wrong intervention       |
| McGurk SR, Twamley EW, Sitzer DI, McHugo GJ, Mueser KT. A meta-analysis of cognitive remediation in schizophrenia. <i>The American Journal of Psychiatry</i> . 2007;164(12):1791-802.                                                                                                                            | wrong intervention       |
| Naeem F, Farooq S, Kingdon D. Cognitive behavioural therapy (brief versus standard duration) for schizophrenia. <i>Cochrane Database of Systematic Reviews</i> . 2015(10).                                                                                                                                       | No meta-analysis of RCTs |
| Penney D, Sauvé G, Mendelson D, Thibodeau É, Moritz S, Lepage M. Immediate and Sustained Outcomes and Moderators Associated With Metacognitive Training for Psychosis: A Systematic Review and Meta-analysis. <i>JAMA Psychiatry</i> . 2022;79(5):417-29.                                                        | No meta-analysis of RCTs |
| Pilling S, Bebbington P, Kuipers E, Garety P, Geddes J, Martindale B, et al. Psychological treatments in schizophrenia: II Meta-analyses of randomized controlled trials of social skills training and cognitive remediation. <i>Psychological Medicine</i> . 2002;32(5):783-91.                                 | Wrong intervention       |
| Prikken M, Konings MJ, Lei WU, Begemann MJH, Sommer IEC. The efficacy of computerized cognitive drill and practice training for patients with a schizophrenia-spectrum disorder: A meta-analysis. <i>Schizophrenia research</i> . 2019;204:368-74.                                                               | Wrong intervention       |
| Riehle M, Pillny M, Buggisch S, Lincoln T. The efficacy of psychosocial treatments for patients with present negative symptoms: A meta-analysis. <i>Eur Arch Psychiatry Clin Neurosci</i> . 2017;267(1):S52.                                                                                                     | Wrong intervention       |
| Roelofs RL, Wingbermühle E, Egger JIM, Kessels RPC. Social Cognitive Interventions in Neuropsychiatric Patients: A Meta-Analysis. <i>Brain Impairment</i> . 2017;18(1):138-73.                                                                                                                                   | Wrong intervention       |
| Sauvé G, Lavigne KM, Pochiet G, Brodeur MB, Lepage M. Efficacy of psychological interventions targeting cognitive biases in schizophrenia: A systematic review and meta-analysis. <i>Clinical psychology review</i> . 2020;78:101854.                                                                            | Wrong intervention       |



|                                                                                                                                                                                                                                                                                                                                |                                                                 |
|--------------------------------------------------------------------------------------------------------------------------------------------------------------------------------------------------------------------------------------------------------------------------------------------------------------------------------|-----------------------------------------------------------------|
| Schwalbe C, Gearing R. The moderating effect of adherence-promoting interventions with clients on evidence-based practices for children and adolescents with mental health problems. <i>Am J Orthopsychiatry</i> . 2012;82(1):146-55.                                                                                          | Wrong diagnosis                                                 |
| Scott AJ, Webb TL, Rowse G. Self-help interventions for psychosis: A meta-analysis. <i>Clin Psychol Rev</i> . 2015;39:96-112.                                                                                                                                                                                                  | Wrong intervention                                              |
| Stafford MR, Mayo-Wilson E, Loucas CE, James A, Hollis C, Birchwood M, et al. Efficacy and safety of pharmacological and psychological interventions for the treatment of psychosis and schizophrenia in children, adolescents and young adults: a systematic review and meta-analysis. <i>PloS one</i> . 2015;10(2):e0117166. | Less than 2 RCTs in meta-analysis                               |
| Turner DT, McGlanaghy E, Cuijpers P, van der Gaag M, Karyotaki E, MacBeth A. A Meta-Analysis of Social Skills Training and Related Interventions for Psychosis. <i>Schizophrenia bulletin</i> . 2018;44(3):475-91.                                                                                                             | Wrong intervention                                              |
| Turner WA, Casey LM. Outcomes associated with virtual reality in psychological interventions: where are we now? <i>Clin Psychol Rev</i> . 2014;34(6):634-44.                                                                                                                                                                   | Wrong intervention                                              |
| Valiente C, Espinosa R, Trucharte A, Nieto J, Martínez-Prado L. The challenge of well-being and quality of life: A meta-analysis of psychological interventions in schizophrenia. <i>Schizophr Res</i> . 2019;208:16-24.                                                                                                       | Wrong intervention                                              |
| Vita A, Barlati S, Ceraso A, Nibbio G, Ariu C, Deste G, et al. Effectiveness, core elements, and moderators of response of cognitive remediation for schizophrenia: A systematic review and meta-analysis of randomized clinical trials. <i>JAMA Psychiatry</i> . 2021;78(8):848-58.                                           | Wrong intervention                                              |
| Wang W, Zhou Y, Chai N, Liu D. Cognitive-behavioural therapy for personal recovery of patients with schizophrenia: A systematic review and meta-analysis. <i>Gen Psychiatr</i> . 2019;32(4):e100040.                                                                                                                           | Retracted                                                       |
| Wood L, Williams C, Billings J, Johnson S. A systematic review and meta-analysis of cognitive behavioural informed psychological interventions for psychiatric inpatients with psychosis. <i>Schizophrenia research</i> . 2020;222:133-44.                                                                                     | Wrong intervention, CBT was in some studies only a subcomponent |
| Wykes T, Huddy V, Cellard C, McGurk SR, Czobor P. A meta-analysis of cognitive remediation for schizophrenia: Methodology and effect sizes. <i>Am J Psychiatry</i> . 2011;168(5):472-85.                                                                                                                                       | Wrong intervention                                              |
| Yeo H, Yoon S, Lee J, Kurtz MM, Choi K. A meta-analysis of the effects of social-cognitive training in schizophrenia: The role of treatment characteristics and study quality. <i>Br J Clin Psychol</i> . 2022;61(1):37-57.                                                                                                    | Wrong intervention                                              |
| Zimmermann G, Favrod J, Trieu VH, Pomini V. The effect of cognitive behavioral treatment on the positive symptoms of schizophrenia spectrum disorders: A meta-analysis. <i>Schizophrenia Research</i> . 2005;77(1):1-9.                                                                                                        | No meta-analysis of RCTs                                        |



**Supplemental Table 2. Non-analyzable data ranked by significance value and publication year.**

| Outcome                                        | First authors and year          | Intervention and control group  | RCTs | Follow-up          | Sample size         | Effect size          | Type of effect size | P-value               |
|------------------------------------------------|---------------------------------|---------------------------------|------|--------------------|---------------------|----------------------|---------------------|-----------------------|
| General psychopathology                        | McGlanaghy et al. 2021          | CBT vs TAU1 (network)           | -    | EoT                | -                   | 0.46 (-0.67; 0.24)   | SMD                 | sig.                  |
|                                                |                                 | CBT vs TAU2 (network)           | -    | EoT                | -                   | -0.32 (-0.80; -0.16) | SMD                 | sig.                  |
|                                                |                                 | CBT vs MPE (network)            | -    | EoT                | -                   | -0.53 (-0.91; -0.15) | SMD                 | sig.                  |
|                                                |                                 | CBT vs PE (network)             | -    | EoT                | -                   | -0.24 (-0.48; 0)     | SMD                 | sig.                  |
|                                                | Bighelli et al. 2021            | CBT vs BF (network)             | -    | EoT                | -                   | -0.33 (-0.63; -0.03) | SMD                 | sig.                  |
|                                                |                                 | CBT vs FP (network)             | -    | EoT                | -                   | -0.46 (-0.83; -0.09) | SMD                 | sig.                  |
|                                                |                                 | CBT vs TAU (pairways)           | 6    | EoT                | -                   | -0.41 (-0.67; -0.16) | SMD                 | sig.                  |
|                                                | Bighelli et al. 2018            | CBT vs MIF (network)            | -    | EoT                | -                   | -0.69 (-1.31; -0.07) | SMD                 | sig.                  |
|                                                |                                 | CBT vs TAU (network)            | -    | EoT                | -                   | -0.38 (-0.56; -0.2)  | SMD                 | sig.                  |
|                                                |                                 | CBT vs TAU (pairways)           | 15   | EoT                | 1208                | -0.36 (-0.54; -0.17) | SMD                 | sig.                  |
|                                                | Naeem et al 2016                | CBT vs WL (pairways)            | 3    | EoT                | 147                 | -0.50 (-0.96; -0.05) | SMD                 | sig.                  |
|                                                |                                 | B-CBT vs TAU                    | 6    | EoT                | -                   | 0.43 (0.24-0.63)     | Hedges' G           | <0.0001               |
|                                                |                                 | B-CBT vs TAU                    | 4    | 1-18 months        | -                   | 0.38 (0.17-0.59)     | Hedges' G           | <0.0001               |
|                                                | Turner, van der Gaag et al 2014 | B-CBT vs mixed                  | 8    | EoT                | -                   | 0.38 (0.2-0.57)      | Hedges' G           | <0.0001               |
|                                                |                                 | B-CBT vs mixed                  | 5    | 1-18 months        | -                   | 0.31 (0.13-0.5)      | Hedges' G           | <0.05                 |
|                                                |                                 | CBT vs OPT                      | 22   | EoT                | -                   | 0.16 (0.04-0.28)     | Hedges' G           | <0.05                 |
|                                                | Sarin et al. 2011               | CBT vs befriending              | 6    | EoT                | -                   | 0.42 (0.15; 0.69)    | Hedges' G           | <0.05                 |
|                                                |                                 | CBT vs OPT (PANSS total)        | 5    | 3-15 months        | 359                 | -4.8 (-8.01; -1.59)  | MD                  | 3.0 x10 <sup>-3</sup> |
|                                                |                                 | CBT vs TAU (PANSS total)        | 4    | 3-15 months        | 452                 | -2.87 (-5.67; -0.08) | MD                  | 0,04                  |
|                                                | Lincoln et al. 2008             | CBT vs OPT (BPRS, CPS, PANSS-g) | 8    | 3-15 months        | 537                 | -0.21 (-0.38; -0.04) | SMD                 | 0,02                  |
| CBT vs TAU                                     |                                 | 6                               | 9-28 | 663                | 0.35 (0.21-0.48)    | SMD                  | 0.00                |                       |
| CBT vs TAU                                     |                                 | 9                               | EoT  | 908                | 0.25 (0.14 -0.36)   | SMD                  | 0.00                |                       |
| Pilling et al. 2002                            | CBT vs AT                       | 6                               | 9-28 | 416                | 0.24 (0.07-0.42)    | SMD                  | 0.01                |                       |
|                                                | CBT vs TAU                      | 4                               | EoT  | 273                | 0.28 (0.15; 0.51)   | OR                   | sig.                |                       |
|                                                | CBT vs TAU                      | 4                               | EoT  | 273                | 0.28 (0.15; 0.51)   | OR                   | sig.                |                       |
| McGlanaghy et al. 2021 (network meta-analysis) | CBT vs TAU0                     | -                               | EoT  | -                  | -0.17 (-0.87; 0.53) | SMD                  | NS                  |                       |
|                                                | CBT vs MCT                      | -                               | EoT  | -                  | 0.01 (-0.78 - 0.8)  | SMD                  | NS                  |                       |
|                                                | CBT vs SST                      | -                               | EoT  | -                  | 0.26 (-0.56- 1.07)  | SMD                  | NS                  |                       |
|                                                | CBT vs CRSS                     | -                               | EoT  | -                  | -0.07 (-0.39- 0.25) | SMD                  | NS                  |                       |
|                                                | CBT vs EMDR                     | -                               | EoT  | -                  | -0.08 (-0.89- 0.73) | SMD                  | NS                  |                       |
|                                                | CBT vs FT                       | -                               | EoT  | -                  | -0.03 (-0.37- 0.32) | SMD                  | NS                  |                       |
|                                                | CBT vs HIT                      | -                               | EoT  | -                  | -0.32 (-1.03- 0.39) | SMD                  | NS                  |                       |
|                                                | CBT vs MCT                      | -                               | EoT  | -                  | 0.07 (-0.43- 0.58)  | SMD                  | NS                  |                       |
|                                                | CBT vs all                      | -                               | EoT  | -                  | -0.13 (-1 - 0.75)   | SMD                  | NS                  |                       |
|                                                | CBT vs CR & MCT                 | -                               | EoT  | -                  | 0.1 (-0.16-0.36)    | SMD                  | NS                  |                       |
|                                                | CBT vs SST                      | -                               | EoT  | -                  | 0 (-0.25- 0.24)     | SMD                  | NS                  |                       |
|                                                | CBT vs TAU                      | -                               | EoT  | -                  | 0.42 (-0.14- 0.97)  | SMD                  | NS                  |                       |
|                                                | CBT vs WB                       | -                               | EoT  | -                  | -0.13 (-0.81- 0.55) | SMD                  | NS                  |                       |
| CBT vs OT                                      | -                               | EoT                             | -    | 0.18 (-0.27; 0.63) | SMD                 | NS                   |                     |                       |

|                   |                                 |                                   |    |             |                      |                      |           |      |
|-------------------|---------------------------------|-----------------------------------|----|-------------|----------------------|----------------------|-----------|------|
|                   |                                 | CBT vs SC                         | -  | EoT         | -                    | -0.13 (-0.37; 0.1)   | SMD       | NS   |
|                   | Bighelli et al. 2021            | CBT vs CM (network)               | -  | EoT         | -                    | -0.4 (-0.8; 0.01)    | SMD       | NS   |
|                   |                                 | CBT vs CT (network)               | -  | EoT         | -                    | -0.32 (-0.97; 0.34)  | SMD       | NS   |
|                   |                                 | CBT vs FI (network)               | -  | EoT         | -                    | -0.08 (-0.44; 0.28)  | SMD       | NS   |
|                   |                                 | CBT vs FS (network)               | -  | EoT         | -                    | -0.45 (-1.18; 0.28)  | SMD       | NS   |
|                   |                                 | CBT vs II (network)               | -  | EoT         | -                    | -0.01 (-0.38; 0.36)  | SMD       | NS   |
|                   |                                 | CBT vs ST (network)               | -  | EoT         | -                    | -0.18 (-0.69; 0.32)  | SMD       | NS   |
|                   |                                 | CBT vs TAU (network)              | -  | EoT         | -                    | -0.38 (-0.62; -0.15) | SMD       | NS   |
|                   |                                 | CBT vs TI (network)               | -  | EoT         | -                    | -0.13 (-0.97; 0.71)  | SMD       | NS   |
|                   |                                 | CBT vs MI (network)               | -  | EoT         | -                    | -0.09 (-0.7; 0.53)   | SMD       | NS   |
|                   |                                 | CBT vs PE (network)               | -  | EoT         | -                    | -0.08 (-0.43; 0.28)  | SMD       | NS   |
|                   |                                 | CBT vs HE (network)               | -  | EoT         | -                    | -0.19 (-1.09; 0.7)   | SMD       | NS   |
|                   |                                 | CBT vs ACT (network)              | -  | EoT         | -                    | -0.17 (-0.6; 0.26)   | SMD       | NS   |
|                   | Bighelli et al. 2018            | CBT vs HFIT (network)             | -  | EoT         | -                    | -0.26 (-0.98; 0.46)  | SMD       | NS   |
|                   |                                 | CBT vs FI (network)               | -  | EoT         | -                    | -0.28 (-0.94; 0.39)  | SMD       | NS   |
|                   |                                 | CBT vs SST (network)              | -  | EoT         | -                    | -0.16 (-0.75; 0.43)  | SMD       | NS   |
|                   |                                 | CBT vs ST (network)               | -  | EoT         | -                    | -0.33 (-0.86; 0.2)   | SMD       | NS   |
|                   |                                 | CBT vs IC (network)               | -  | EoT         | -                    | -0.17 (-0.46; 0.11)  | SMD       | NS   |
|                   |                                 | CBT vs WL (network)               | -  | EoT         | -                    | -0.36 (-0.80; 0.07)  | SMD       | NS   |
|                   |                                 | CBT vs ACT (network)              | -  | EoT         | -                    | -0.33 (-1.03; 0.37)  | SMD       | NS   |
|                   |                                 | CBT vs EFC (network)              | -  | EoT         | -                    | 0.16 (-1.13; 1.45)   | SMD       | NS   |
|                   |                                 | CBT vs IC (pairways)              | 7  | EoT         | 492                  | -0.17 (-0.46; 0.11)  | SMD       | NS   |
|                   |                                 | CBT vs MT (network)               | -  | EoT         | -                    | -0.49 (-1.26; 0.28)  | SMD       | NS   |
|                   | Turner, van der Gaag et al 2014 | CBT vs OPT (PANSS)                | 8  | EoT         | -                    | 0.1 (-0.13; 0.32)    | Hedges' G | NS   |
|                   |                                 | CBT vs supportive counseling      | 8  | EoT         | -                    | 0.1 (-0.1; 0.3)      | Hedges' G | NS   |
|                   | Burns et al. 2014               | CBT vs mixed (therapy resistance) | 12 | EoT         | 639 (CBT + controls) | 0.52 (0.35 -0.7)     | Hedges' G | NS   |
|                   |                                 | CBT vs mixed (therapy resistance) | 7  | 3-8 months  | 381 (CBT + controls) | 0.4 (0.2-0.6)        | Hedges' G | NS   |
|                   | Sarin et al. 2011               | CBT vs OPT (PANSS total)          | 5  | EoT         | 357                  | -2.09 (-4.96-0.78)   | MD        | 0,15 |
|                   |                                 | CBT vs TAU (PANSS total)          | 4  | EoT         | 529                  | -1.25 (-3.75- 1.25)  | MD        | 0,33 |
|                   |                                 | CBT vs OPT (BPRS, CPS, PANS-g)    | 9  | EoT         | 571                  | -0.07 (-0.23-0.1)    | SMD       | 0,43 |
|                   |                                 | CBT vs TAU (BPRS, CPS, PANS-g)    | 4  | EoT         | 476                  | -0.1 (-0.29-0.08)    | SMD       | 0,26 |
|                   |                                 | CBT vs TAU (BPRS, CPS, PANS-g)    | 4  | 3-15 months | 469                  | -0.14 (-0.32- 0.05)  | SMD       | 0,14 |
|                   |                                 | CBT vs TAU (BPRS, CPS, PANS-g)    | 4  | EoT         | 559                  | 0.07 (-0.22 -0.36)   | SMD       | 0,64 |
|                   | Lincoln et al. 2008             | CBT vs AT                         | 10 |             |                      |                      |           |      |
| Positive symptoms | Bighelli et al. 2021            | CBT vs ACT (network)              | -  | EoT         | -                    | -0.64 (-1.25; -0.02) | SMD       | sig. |
|                   |                                 | CBT vs TAU (pairways)             | 6  | EoT         | -                    | -0.27 (-0.43; -0.1)  | SMD       | sig. |
|                   | Jones, Hacker, Xia et al. 2018  | CBT vs TAU                        | 11 | < 6 months  | -                    | -3.11 (-4.97; -1.24) | MD        | sig. |
|                   |                                 | CBT vs TAU                        | 11 | 6-12 months | -                    | -1.23 (-1.9 ; -0.55) | MD        | sig. |

|                   |                                  |                                   |    |             |                      |                      |           |                       |
|-------------------|----------------------------------|-----------------------------------|----|-------------|----------------------|----------------------|-----------|-----------------------|
|                   | Bighelli et al. 2018             | CBT vs TAU (pairways)             | 18 | EoT         |                      | -0.28 (-0.44; -0.12) | SMD       | sig.                  |
|                   |                                  | CBT vs IC (network)               | -  | EoT         | -                    | -0.29 (-0.55; -0.03) | SMD       | sig.                  |
|                   |                                  | CBT vs IC (pairways)              | 7  | EoT         |                      | -0.34 (-0.60; -0.07) | SMD       | sig.                  |
|                   | Burns et al. 2014                | CBT vs mixed (therapy resistance) | 7  | 3-8 months  | 365 (CBT + controls) | 0.41 (0.2-0.61)      | Hedges' G | 0.05                  |
|                   | Turner, van der Gaag et al. 2014 | CBT vs OPT                        | 17 | EoT         | -                    | 0.16 (0.04;0.28)     | Hedges' G | <0.05                 |
|                   |                                  | CBT vs supportive counseling      | 6  | EoT         | -                    | 0.23 (0.01;0.44)     | Hedges' G | <0.05                 |
|                   | Sarin et al. 2011                | CBT vs OPT                        | 7  | 3-15 months | 483                  | -1.01 (-1.85;-0.18)  | MD        | 0,02                  |
|                   | Lincoln et al. 2008              | CBT vs TAU                        | 6  | EoT         | 493                  | 0.21 (0.04-0.39)     |           | 0.02                  |
|                   | Wykes et al. 2008                | CBT vs Mixed                      | 32 | EoT         | 1918                 | 0.372 (0.228-0.516)  | SMD       | sig.                  |
|                   | Bighelli et al. 2021             | CBT vs CM (network)               | -  | EoT         | -                    | -0.15 (-0.46; 0.16)  | SMD       | NS                    |
|                   |                                  | CBT vs FI (network)               | -  | EoT         | -                    | -0.1 (-0.41; 0.21)   | SMD       | NS                    |
|                   |                                  | CBT vs II (network)               | -  | EoT         | -                    | -0.02 (-0.33; 0.29)  | SMD       | NS                    |
|                   |                                  | CBT vs RG (network)               | -  | EoT         | -                    | -0.07 (-0.54; 0.4)   | SMD       | NS                    |
|                   |                                  | CBT vs TAU (network)              | -  | EoT         | -                    | -0.29 (-0.45; -0.13) | SMD       | NS                    |
|                   |                                  | CBT vs FP (network)               | -  | EoT         | -                    | -0.02 (-0.28; 0.23)  | SMD       | NS                    |
|                   |                                  | CBT vs PE (network)               | -  | EoT         | -                    | -0.13 (-0.49; 0.22)  | SMD       | NS                    |
|                   |                                  | CBT vs HE (network)               | -  | EoT         | -                    | -0.2 (-0.85; 0.44)   | SMD       | NS                    |
|                   |                                  | CBT vs MI (network)               | -  | EoT         | -                    | -0.17 (-0.58; 0.24)  | SMD       | NS                    |
|                   |                                  | CBT vs TI (network)               | -  | EoT         | -                    | -0.51 (-1.24; 0.22)  | SMD       | NS                    |
|                   | Bighelli et al. 2018             | CBT vs ACT (network)              | -  | EoT         | -                    | -0.52 (-1.17; 0.14)  | SMD       | NS                    |
|                   |                                  | CBT vs AVATAR (network)           | -  | EoT         | -                    | -0.09 (-0.71; 0.54)  | SMD       | NS                    |
|                   |                                  | CBT vs EFC (network)              | -  | EoT         | -                    | -0.06 (-1.31; 1.19)  | SMD       | NS                    |
|                   |                                  | CBT vs FI (network)               | -  | EoT         | -                    | -0.15 (-0.79; 0.48)  | SMD       | NS                    |
|                   |                                  | CBT vs HFIT (network)             | -  | EoT         | -                    | -0.40 (-1.07; -0.28) | SMD       | NS                    |
|                   |                                  | CBT vs MF (network)               | -  | EoT         | -                    | -0.17 (-0.71; 0.38)  | SMD       | NS                    |
|                   |                                  | CBT vs MT (network)               | -  | EoT         | -                    | -0.07 (-0.44; 0.30)  | SMD       | NS                    |
|                   |                                  | CBT vs SST(network)               | -  | EoT         | -                    | -0.21 (-0.75; 0.34)  | SMD       | NS                    |
|                   | Burns et al. 2014                | CBT vs mixed (therapy resistance) | 9  | EoT         | 465 (CBT + controls) | 0.47 (0.27- 0.67)    | Hedges' G | NS                    |
|                   | Sarin et al. 2011                | CBT vs OPT                        | 7  | EoT         | 504                  | -0.55 (-1.37-0.27)   | MD        | 0,19                  |
|                   |                                  | CBT vs TAU                        | 3  | EoT         | 417                  | -0.62 (-1.86-0.61)   | MD        | 0,32                  |
|                   |                                  | CBT vs TAU                        | 3  | 3-15 months | 415                  | -0.67 (-1.7-0.36)    | MD        | 0,20                  |
|                   | Lincoln et al. 2008              | CBT vs AT                         | 8  | EoT         | 445                  | 0.24 (-0.2 -0.68)    | SMD       | 0,29                  |
|                   |                                  | CBT vs AT                         | 6  | 9-28 months | 338                  | 0.16 (0.01 -0.32)    | SMD       | 0,06                  |
|                   |                                  | CBT vs TAU                        | 4  | 9-28 months | 663                  | 0.2 (-0.05-0.44)     | SMD       | 0,12                  |
| Negative symptoms | Bighelli et al. 2021             | CBT vs CM (network)               | -  | EoT         | -                    | -0.37 (-0.58; -0.16) | SMD       | sig.                  |
|                   |                                  | CBT vs TAU (pairways)             | 6  | EoT         | -                    | -0.3 (-0.47; -0.14)  | SMD       | sig.                  |
|                   |                                  | CBT vs TI (network)               | -  | EoT         | -                    | -0.76 (-1.47; -0.04) | SMD       | sig.                  |
|                   | Jones, Hacker, Xia et al. 2018   | CBT vs TAU                        | 12 | < 6 months  | -                    | -3.35 (-3.84; -2.85) | MD        | 1.0 x10 <sup>-5</sup> |

|                |                                  |                       |    |             |      |                       |           |                      |
|----------------|----------------------------------|-----------------------|----|-------------|------|-----------------------|-----------|----------------------|
|                |                                  | CBT vs TAU            | 13 | 6-12 months | -    | -1.43 (-1.94 ; -0.93) | MD        | $1.0 \times 10^{-5}$ |
|                |                                  | CBT vs TAU            | 13 | >12 months  | -    | -1.47 (-1.94 ; -0.99) | MD        | $1.0 \times 10^{-4}$ |
|                | Bighelli et al. 2018             | CBT vs TAU (network)  | -  | EoT         | -    | -0.16 (-0.29; -0.03)  | SMD       | sig.                 |
|                |                                  | CBT vs TAU (pairways) | 11 | EoT         | 916  | -0.15 (-0.29; -0.02)  | SMD       | sig.                 |
|                | Lincoln et al. 2008              | CBT vs mixed          | 8  | EoT         | 236  | 0.56 (0.25-0.86)      | SMD       | -                    |
|                | Wykes et al. 2008                | CBT vs mixed          | 23 | EoT         | 1268 | 0.44 (0.17; -0.70)    | SMD       | sig.                 |
|                | Bighelli et al. 2021             | CBT vs FI (network)   | -  | EoT         | -    | -0.34 (-0.69; 0.01)   |           | NS                   |
|                |                                  | CBT vs FP (network)   | -  | EoT         | -    | -0.17 (-0.44; 0.11)   |           | NS                   |
|                |                                  | CBT vs ST (network)   | -  | EoT         | -    | -0.18 (-0.46; 0.1)    |           | NS                   |
|                |                                  | CBT vs TAU (network)  | -  | EoT         | -    | -0.31 (-0.47; -0.15)  |           | NS                   |
|                |                                  | CBT vs HE (network)   | -  | EoT         | -    | -0.08 (-0.72; 0.57)   |           | NS                   |
|                |                                  | CBT vs MI (network)   | -  | EoT         | -    | -0.14 (-0.55; 0.27)   |           | NS                   |
|                |                                  | CBT vs ACT (network)  | -  | EoT         | -    | -0.19 (-0.78; 0.41)   |           | NS                   |
|                |                                  | CBT vs II (network)   | -  | EoT         | -    | -0.17 (-0.47; 0.13)   |           | NS                   |
|                |                                  | CBT vs PE (network)   | -  | EoT         | -    | -0.23 (-0.58; 0.11)   |           | NS                   |
|                | Bighelli et al. 2018             | ACT (network)         | -  | EoT         | -    | 0.05 (-0.40; 0.49)    | SMD       | NS                   |
|                |                                  | AVATAR (network)      | -  | EoT         | -    | -0.14 (-0.55; 0.26)   | SMD       | NS                   |
|                |                                  | FI (network)          | -  | EoT         | -    | -0.18 (-0.69; 0.33)   | SMD       | NS                   |
|                |                                  | HFIT (network)        | -  | EoT         | -    | -0.09 (-0.59; 0.41)   | SMD       | NS                   |
|                |                                  | IC (network)          | -  | EoT         | -    | -0.09 (-0.26; 0.08)   | SMD       | NS                   |
|                |                                  | MT (network)          | -  | EoT         | -    | -0.16 (-0.80; 0.48)   | SMD       | NS                   |
|                |                                  | SST (network)         | -  | EoT         | -    | 0.01 (-0.37; 0.39)    | SMD       | NS                   |
|                |                                  | ST (network)          | -  | EoT         | -    | 0.00 (-0.65; 0.65)    | SMD       | NS                   |
|                |                                  | CBT vs WL (network)   | -  | EoT         | -    | -0.12 (-0.48; 0.24)   | SMD       | NS                   |
|                |                                  | CBT vs IC (pairways)  | 8  | EoT         | 558  | -0.09 (-0.26; 0.08)   | SMD       | NS                   |
|                |                                  | CBT vs FI (pairways)  | -  | EoT         | -    | -0.19 (-0.78; 0.4)    |           | NS                   |
|                | Turner, van der Gaag et al. 2014 | CBT vs OPT            | 15 | EoT         | -    | 0.04 (-0.09; 0.16)    | Hedges' G | NS                   |
|                | Sarin et al. 2011                | CBT vs OPT            | 8  | 3-15 months | 452  | -0.2 (-0.39; -0.02)   | SMD       | 0,03                 |
|                | Sarin et al. 2011                | CBT vs OPT            | 8  | EoT         | 461  | -0.1 (-0.28- 0.09)    | SMD       | 0,31                 |
|                |                                  | CBT vs TAU            | 3  | EoT         | 328  | -0.10 (-0.32; 0.11)   | SMD       | 0,35                 |
|                |                                  | CBT vs TAU            | 3  | 3-15 months | 318  | -0.21 (-0.43; 0.01)   | SMD       | 0,07                 |
|                |                                  |                       |    |             |      |                       |           |                      |
| Delusions      | Turner, Burger et al 2020        | CBT vs TAU            | 22 | EoT         | -    | 0.36 (0.2 ; 0.52)     | Hedges' G | <0.01                |
|                | Naeem et al. 2016                | B-CBT vs TAU          | 4  | EoT         | -    | 0.56 (0.09-1.03)      | Hedges' G | <0.05                |
|                | Turner, Burger et al 2020        | CBT vs AT             | 7  | EoT         | -    | 0.23 (-0.19; 0.55)    | Hedges' G | NS                   |
|                |                                  |                       |    |             |      |                       |           |                      |
| Hallucinations | Turner, Burger et al. 2020       | CBT vs AT             | 8  | EoT         | -    | 0.34 (0.15 ; 0.53)    | Hedges' G | <0.01                |
|                |                                  | CBT vs TAU            | 22 | EoT         | -    | 0.35 (0.18 ; 0.52)    | Hedges' G | <0.01                |
|                | Naeem et al. 2016                | B-CBT vs TAU          | 3  |             |      | 0.45 (0.18-0.72)      | Hedges' G | $5.0 \times 10^{-3}$ |
|                | Sarin et al. 2011                | CBT vs OPT            | 5  | EoT         | 268  | -1.04 (3.41-1.33)     | MD        | 0,39                 |
|                |                                  | CBT vs OPT            | 4  | 3-15 months | 239  | -1.58 -(4.23--1.07)   | MD        | 0,24                 |

**Supplemental Table 3. Non-analyzable data of secondary outcomes, ranked by significance value and publication year.**

| Outcome                   | First author(s) and year       | Intervention and control group | RCTs                  | Follow-up   | Cases               | Effect size           | Type of effect size | P-value               |    |
|---------------------------|--------------------------------|--------------------------------|-----------------------|-------------|---------------------|-----------------------|---------------------|-----------------------|----|
| Affective symptoms        | Jones, Hacker, Xia et al. 2018 | CBT vs TAU                     | -                     | < 6 months  | -                   | -4.86 (-5.75 ; -3.96) | MD                  | 1.0 x10 <sup>-4</sup> |    |
|                           |                                | CBT vs TAU                     | -                     | >12 months  | -                   | -1.00 (-1.82 ; -0.18) | MD                  | 0,02                  |    |
|                           |                                | CBT vs TAU                     | -                     | 6-12 months | -                   | -0.80 (-1.7 ; 0.09)   | MD                  | 0,08                  |    |
| Anxiety                   | -                              |                                |                       |             |                     |                       |                     |                       |    |
| Depressive symptoms       | Bighelli et al. 2021           | CBT vs CM (network)            | -                     | EoT         | -                   | -0.12 (-2.24; 2.01)   | SMD                 | NS                    |    |
|                           |                                | CBT vs ACT (network)           | -                     | EoT         | -                   | 0 (-2.2; 2.19)        | SMD                 | NS                    |    |
|                           |                                | CBT vs TI (network)            | -                     | EoT         | -                   | -0.06 (-2.29; 2.17)   | SMD                 | NS                    |    |
|                           |                                | CBT vs FI (network)            | -                     | EoT         | -                   | -0.39 (-1.85; 1.08)   | SMD                 | NS                    |    |
|                           |                                | CBT vs TAU (pairways)          | 3                     | EoT         | -                   | 0.15 (-0.98; 1.27)    | SMD                 | NS                    |    |
|                           |                                | CBT vs II (network)            | -                     | EoT         | -                   | -0.04 (-2.2; 2.11)    | SMD                 | NS                    |    |
|                           |                                | CBT vs PE (network)            | -                     | EoT         | -                   | -0.07 (-2.23; 2.1)    | SMD                 | NS                    |    |
|                           |                                | CBT vs TAU (network)           | -                     | EoT         | -                   | -0.04 (-1.14; 1.05)   | SMD                 | NS                    |    |
|                           |                                | Bighelli et al. 2018           | CBT vs HFIT (network) | -           | EoT                 | -                     | -0.31 (-0.86; 0.25) | SMD                   | NS |
|                           |                                |                                | CBT vs MF (network)   | -           | EoT                 | -                     | -0.23 (-0.73; 0.27) | SMD                   | NS |
|                           | CBT vs AVATAR (network)        |                                | -                     | EoT         | -                   | -0.19 (-0.73; 0.35)   | SMD                 | NS                    |    |
|                           | CBT vs EFC (network)           |                                | -                     | EoT         | -                   | -0.25 (-1.45; 0.95)   | SMD                 | NS                    |    |
|                           | CBT vs FI (network)            |                                | -                     | EoT         | -                   | -0.48 (-1.04; 0.08)   | SMD                 | NS                    |    |
|                           | CBT vs IC (network)            |                                | -                     | EoT         | -                   | -0.20 (-0.53; 0.14)   | SMD                 | NS                    |    |
|                           | CBT vs TAU (network)           |                                | -                     | EoT         | -                   | -0.14 (-0.32; 0.03)   | SMD                 | NS                    |    |
|                           | CBT vs WL (network)            |                                | -                     | EoT         | -                   | -0.05 (-0.43; 0.33)   | SMD                 | NS                    |    |
|                           | CBT vs IC (pair)               |                                | 3                     | EoT         | 183                 | -0.20 (-0.53; 0.14)   | SMD                 | NS                    |    |
|                           | CBT vs TAU (pair)              |                                | 11                    | EoT         | 697                 | -0.14 (-0.32; 0.03)   | SMD                 | NS                    |    |
|                           | Sarin et al. 2011              | CBT vs OPT                     | 3                     | EoT         | 150                 | -1.03 (-4.31; 2.24)   | MD                  | 0,54                  |    |
|                           |                                | CBT vs TAU                     | 3                     | EoT         | 356                 | 0.92 (-1.78; 3.61)    | MD                  | 0,51                  |    |
| CBT vs OPT                |                                | 3                              | 3-15                  | 139         | -3.25 (-6.77; 0.27) | MD                    | 0,07                |                       |    |
| Lincoln et al. 2008       | CBT vs AT                      | 3                              | EoT                   | 295         | 0.52 (0.14; 0.91)   | -                     | -                   |                       |    |
|                           | CBT vs AT                      | 4                              | -                     | 319         | 0.01 (-0.21 ; 0.24) | -                     | NS                  |                       |    |
| Relapse/rehospitalisation | Bighelli et al. 2021           | CBT vs TAU                     | 6                     | -           | 906                 | 0.26 (0.13; 0.39)     | -                   | sig.                  |    |
|                           |                                | CBT vs CM (network)            | -                     | 6-12 months | -                   | 0.50 (0.26; 0.96)     | OR                  | sig.                  |    |
|                           |                                | CBT vs FS (network)            | -                     | 6-12 months | -                   | 0.21 (0.07; 0.64)     | OR                  | sig.                  |    |
|                           |                                | CBT vs FP (network)            | -                     | >12 months  | -                   | 0.41 (0.17; 0.97)     | OR                  | sig.                  |    |
|                           |                                | CBT vs FI (network)            | -                     | >12 months  | -                   | 0.38 (0.19; 0.77)     | OR                  | sig.                  |    |
|                           |                                | CBT vs RPP (network)           | -                     | >12 months  | -                   | 0.21 (0.05; 0.98)     | OR                  | sig.                  |    |
|                           |                                | CBT vs RG (network)            | -                     | <6 months   | -                   | 0.29 (0.09; 0.97)     | OR                  | sig.                  |    |
|                           |                                | CBT vs TAU (pairways)          | 4                     | 6-12 months | -                   | 0.45 (0.26; 0.79)     | OR                  | sig.                  |    |
|                           |                                | Bighelli et al. 2021           | CBT vs ACT (network)  | -           | 6-12 months         | -                     | 0.66 (0.3; 1.46)    | OR                    | NS |
|                           |                                |                                | CBT vs ACTP (network) | -           | 6-12 months         | -                     | 1.15 (0.32; 4.12)   | OR                    | NS |
| CBT vs FP(network)        | -                              |                                | 6-12 months           | -           | 0.8 (0.43; 1.5)     | OR                    | NS                  |                       |    |
|                           |                                | CBT vs HE(network)             | -                     | 6-12 months | -                   | 0.2 (0.03; 1.31)      | OR                  | NS                    |    |

|                    |                     |                         |   |             |     |                   |    |    |
|--------------------|---------------------|-------------------------|---|-------------|-----|-------------------|----|----|
|                    |                     | CBT vs II (network)     | - | 6-12 months |     | 0.73 (0.4; 1.34)  | OR | NS |
|                    |                     | CBT vs MI (network)     | - | 6-12 months |     | 0.34 (0.04; 2.85) | OR | NS |
|                    |                     | CBT vs PE (network)     | - | 6-12 months |     | 0.72 (0.38; 1.36) | OR | NS |
|                    |                     | CBT vs RE (network)     | - | 6-12 months |     | 0.64 (0.34; 1.2)  | OR | NS |
|                    |                     | CBT vs RG (network)     | - | 6-12 months |     | 0.57 (0.22; 1.43) | OR | NS |
|                    |                     | CBT vs SST (network)    | - | 6-12 months |     | 0.73 (0.35; 1.52) | OR | NS |
|                    |                     | CBT vs ST (network)     | - | 6-12 months |     | 0.85 (0.42; 1.7)  | OR | NS |
|                    |                     | CBT vs TAU (network)    | - | 6-12 months |     | 0.45 (0.27; 0.75) | OR | NS |
|                    |                     | CBT vs TI (network)     | - | 6-12 months |     | 0.71 (0.28; 1.78) | OR | NS |
|                    |                     | CBT vs CT (network)     | - | 6-12 months |     | 0.69 (0.14; 3.36) | OR | NS |
|                    |                     | CBT vs RPP (network)    | - | 6-12 months |     | 0.73 (0.27; 2.01) | OR | NS |
|                    |                     | CBT vs FI (network)     | - | 6-12 months |     | 0.77 (0.42; 1.43) | OR | NS |
|                    |                     | CBT vs CM (network)     | - | <6 months   |     | 0.77 (0.30; 1.95) | OR | NS |
|                    |                     | CBT vs CT (network)     | - | <6 months   |     | 0.92 (0.12; 6.82) | OR | NS |
|                    |                     | CBT vs FI (network)     | - | <6 months   |     | 0.90 (0.37; 2.19) | OR | NS |
|                    |                     | CBT vs FP (network)     | - | <6 months   |     | 0.84 (0.34; 2.07) | OR | NS |
|                    |                     | CBT vs FS (network)     | - | <6 months   |     | 0.41 (0.11; 1.61) | OR | NS |
|                    |                     | CBT vs PE (network)     | - | <6 months   |     | 0.82 (0.35; 1.89) | OR | NS |
|                    |                     | CBT vs SST (network)    | - | <6 months   |     | 0.16 (0.02; 1.54) | OR | NS |
|                    |                     | CBT vs RE (network)     | - | <6 months   |     | 0.93 (0.39; 2.18) | OR | NS |
|                    |                     | CBT vs TI (network)     | - | <6 months   |     | 0.72 (0.17; 3.1)  | OR | NS |
|                    |                     | CBT vs II (network)     | - | <6 months   |     | 0.79 (0.34; 1.81) | OR | NS |
|                    |                     | CBT vs ACTP (network)   | - | <6 months   |     | 0.69 (0.19; 2.57) | OR | NS |
|                    |                     | CBT vs RPP (network)    | - | <6 months   |     | 0.71 (0.22; 2.28) | OR | NS |
|                    |                     | CBT vs ACT (network)    | - | <6 months   |     | 0.36 (0.09; 1.37) | OR | NS |
|                    |                     | CBT vs TAU (network)    | - | <6 months   |     | 0.57 (0.27; 1.19) | OR | NS |
|                    |                     | CBT vs TAU (network)    | - | >12 months  |     | 1.03 (0.54; 1.97) | OR | NS |
|                    |                     | CBT vs FS (network)     | - | >12 months  |     | 0.6 (0.13; 2.69)  | OR | NS |
|                    |                     | CBT vs RG (network)     | - | >12 months  |     | 0.89 (0.25; 3.21) | OR | NS |
|                    |                     | CBT vs CM (network)     | - | >12 months  |     | 0.83 (0.34; 2.01) | OR | NS |
|                    |                     | CBT vs PE (network)     | - | >12 months  |     | 0.79 (0.35; 1.77) | OR | NS |
|                    |                     | CBT vs TI (network)     | - | >12 months  |     | 0.8 (0.2; 3.24)   | OR | NS |
|                    |                     | CBT vs ACT (network)    | - | >12 months  |     | 0.63 (0.22; 1.83) | OR | NS |
|                    |                     | CBT vs RE (network)     | - | >12 months  |     | 0.5 (0.21; 1.17)  | OR | NS |
|                    |                     | CBT vs II (network)     | - | >12 months  |     | 0.48 (0.21; 1.1)  | OR | NS |
|                    |                     | CBT vs CT (network)     | - | >12 months  |     | 0.33 (0.08; 1.43) | OR | NS |
|                    |                     | CBT vs HE (network)     | - | >12 months  |     | 0.21 (0.03; 1.66) | OR | NS |
|                    |                     | CBT vs SST (network)    | - | >12 months  |     | 0.78 (0.34; 1.79) | OR | NS |
|                    |                     | CBT vs TAU (pairways)   | 3 | <6 months   | -   | 0.67 (0.28; 1.57) | OR | NS |
|                    |                     | CBT vs ST (network)     | - | >12 months  |     | 0.96 (0.41; 2.26) | OR | NS |
|                    | Pilling et al. 2002 | CBT vs active treatment | 4 | EoT         | 238 | 0.74 (0.42; 1.28) | OR | NS |
|                    |                     | CBT vs other treatments | 6 | EoT         | 363 | 0.69 (0.44; 1.1)  | OR | NS |
|                    |                     | CBT vs standard care    | 3 | EoT         | 163 | 0.73 (0.36-1.47)  | OR | NS |
|                    |                     | CBT vs all treatments   | 4 | 9-18 months | 161 | 0.83 (0.16-4.24)  | OR | NS |
| Social functioning | -                   |                         |   |             |     |                   |    |    |



|                          |                      |                       |    |     |     |                      |           |        |
|--------------------------|----------------------|-----------------------|----|-----|-----|----------------------|-----------|--------|
| Functioning and distress | Bighelli et al. 2018 | CBT vs TAU (pairways) | 9  | EoT | 734 | -0.25 (-0.48; -0.03) | SMD       | sig.   |
|                          | Bighelli et al. 2021 | CBT vs TAU (pairways) | 5  | EoT | -   | -0.49 (-0.93; -0.06) | OR        | sig.   |
|                          |                      | CBT vs TAU (network)  | -  | EoT | -   | -0.25 (-0.48; -0.03) | SMD       | sig.   |
|                          | Wykes et al. 2008    | CBT vs TAU            | 15 | EoT | 867 | 0.378 (0.154-0.602)  | SMD       | sig.   |
|                          | Lincoln et al. 2008  | CBT vs TAU            | 4  | -   | 83  | 0.82 (0.07; 1.71)    | SMD       | -      |
|                          | Bighelli et al. 2021 | CBT vs TAU (network)  | -  | EoT |     | -0.63 (-1.06; -0.2)  | SMD       | NS     |
|                          |                      | CBT vs FI (network)   | -  | EoT |     | -0.80 (-1.54; -0.05) | SMD       | NS     |
|                          |                      | CBT vs MIF (network)  | -  | EoT |     | -0.63 (-1.74; 0.48)  | SMD       | NS     |
|                          |                      | CBT vs SST (network)  | -  | EoT |     | -0.32 (-1.72; 1.07)  | SMD       | NS     |
|                          |                      | CBT vs PE (network)   | -  | EoT |     | 0.05 (-1.05; 1.15)   | SMD       | NS     |
|                          |                      | CBT vs RG (network)   | -  | EoT |     | -0.06 (-0.84; 0.72)  | SMD       | NS     |
|                          |                      | CBT vs MI (network)   | -  | EoT |     | -0.05 (-1.11; 1.01)  | SMD       | NS     |
|                          |                      | CBT vs II (network)   | -  | EoT |     | -0.12 (-0.85; 0.62)  | SMD       | NS     |
|                          |                      | CBT vs ST (network)   | -  | EoT |     | -0.2 (-1.13; 0.74)   | SMD       | NS     |
|                          |                      | CBT vs FS (network)   | -  | EoT |     | -0.25 (-1.5; 0.99)   | SMD       | NS     |
|                          |                      | CBT vs ACT (network)  | -  | EoT |     | -0.27 (-0.99; 0.46)  | SMD       | NS     |
|                          |                      | CBT vs FP (network)   | -  | EoT |     | -0.32 (-0.94; 0.3)   | SMD       | NS     |
|                          |                      | CBT vs CM (network)   | -  | EoT |     | -0.64 (-1.42; 0.14)  | SMD       | NS     |
|                          | Bighelli et al. 2018 | CBT vs HFIT (network) | -  | EoT | -   | -0.33 (-1.05; 0.39)  | SMD       | NS     |
|                          |                      | CBT vs MF (network)   | -  | EoT | -   | -0.29 (-1.44; 0.85)  | SMD       | NS     |
|                          |                      | CBT vs ST (network)   | -  | EoT | -   | -0.13 (-0.83; 0.57)  | SMD       | NS     |
|                          |                      | CBT vs FI (network)   | -  | EoT | -   | -0.23 (-0.87; 0.42)  | SMD       | NS     |
|                          |                      | CBT vs WL (network)   | -  | EoT | -   | -0.24 (-0.70; 0.22)  | SMD       | NS     |
|                          |                      | CBT vs ACT (network)  | -  | EoT | -   | -0.39 (-1.09; 0.32)  | SMD       | NS     |
|                          |                      | CBT vs IC (network)   | -  | EoT | -   | -0.34 (-0.70; 0.02)  | SMD       | NS     |
|                          |                      | CBT vs IC (pairways)  | 3  | EoT | 315 | -0.34 (-0.70; 0.02)  | SMD       | NS     |
| Quality of life          | Bighelli et al. 2018 | CBT vs TAU (pairways) | 5  | EoT | 401 |                      | SMD       | sig.   |
|                          |                      | CBT vs TAU (network)  | -  | EoT | -   |                      | SMD       | sig.   |
|                          | Naeem et al 2016     | B-CBT vs TAU          | 3  | EoT |     |                      | Hedges' G | <0.005 |
|                          | Bighelli et al. 2018 | CBT vs HFIT (network) | -  | EoT | -   |                      | SMD       | NS     |
|                          |                      | CBT vs WL (network)   | -  | EoT | -   |                      | SMD       | NS     |
| Suicide                  | Bighelli et al. 2021 | CBT vs CM (network)   | -  | EoT |     | 0.39 (0.01; 17.39)   | OR        | NS     |
|                          |                      | CBT vs FP (network)   | -  | EoT |     | 0.62 (0.01; 35.28)   | OR        | NS     |
|                          |                      | CBT vs FS (network)   | -  | EoT |     | 0.41 (0; 76.56)      | OR        | NS     |
|                          |                      | CBT vs PE (network)   | -  | EoT |     | 0.12 (0; 13.77)      | OR        | NS     |
|                          |                      | CBT vs RG (network)   | -  | EoT |     | 0.82 (0.02; 42.16)   | OR        | NS     |
|                          |                      | CBT vs FI (network)   | -  | EoT |     | 0.56 (0.01; 21.19)   | OR        | NS     |
|                          |                      | CBT vs ACT (network)  | -  | EoT |     | 0.54 (0.01; 39.26)   | OR        | NS     |
|                          |                      | CBT vs II (network)   | -  | EoT |     | 0.52 (0.01; 41.27)   | OR        | NS     |
|                          |                      | CBT vs ST (network)   | -  | EoT |     | 0.96 (0.06; 15.56)   | OR        | NS     |
|                          |                      | CBT vs TAU (network)  | -  | EoT |     | 0.60 (0.02; 22.76)   | OR        | NS     |

Abbreviations: CBT: cognitive behavioral therapy, TAU: treatment as usual, end of treatment, NMA: network meta-analysis, PWA: pairwise meta-analysis, ES: effect size, MD: mean difference, OR: odds ratio, SMD: standard mean difference, NS: non-significant, CI: confidence interval, TAU1: , TAU2: , MPE: Mindfulness-based

psychoeducation, PE: Psycho-education, BF: befriending, FP: family psychoeducation, MIF: , WL: waiting list, B-CBT: , OPT: Other psychological treatments, PANSS: Positive and Negative Syndrome Scale, BPRS: Brief Psychiatric Rating Scale, CPS: , AT: active treatment, MCT: Metacognitive therapy, SST: Social skills training, CRSS: Cognitive remediation focused on social cognition, EMDR: Eye movement desensitization and reprocessing, FT: family therapy, HIT: Hallucinations focused integrative therapy, ALL: Protocol with 4 psychotherapies combined, CR: Cognitive remediation; CR\_MCT: Cognitive remediation with Metacognitive therapy, WB: Wellbeing, Occupational therapy, SC: Supportive counselling, CT: Cognitive training, II: Integrated intervention, TI: Telemedicine, HE: health education, ACT: Acceptance and commitment therapy, HFIT: Hallucination focused integrative treatment, IC: Inactive control, MT: Metacognitive training, CM: Case management, RG: Relatives groups, EFC: Experience focused counselling, MF : Mindfulness, FS: Family support.

**Supplemental Table 4. Sensitivity analysis, with only comparisons that include > 20 RCTs.**

| Outcome                  | Authors and year           | Intervention and control group                                                                                            | RCTs | Follow-up | Sample size | Hedges' G*           | P-value                 | I <sup>2</sup> (%) | PI 95CI% | SSE/ESB/LS | CE  |
|--------------------------|----------------------------|---------------------------------------------------------------------------------------------------------------------------|------|-----------|-------------|----------------------|-------------------------|--------------------|----------|------------|-----|
| General psychopathology  | Jauhar et al. 2014         | CBT vs TAU (68%), Unknown (19%), BF (3%), PE (3%), SC (2%), SAT (2%), CR (1%), ST(1%), GS (1%)                            | 34   | EoT       | 2991        | -0.33 (-0.47; -0.19) | 0.42 x 10 <sup>-5</sup> | 67.93              | Notnull  | No/No/Yes  | III |
| Positive symptoms        | Jauhar et al. 2014         | TAU (60%), Unknown (21%), PE (5%), GF-SC (3%), BF (2%), SAT (2%), SC (2%), RS (2%), CR (2%), ST (1%), GS (0%)             | 33   | EoT       | 2452        | -0.26 (-0.37; -0.14) | 0.20 x 10 <sup>-4</sup> | 52.44              | Null     | No/No/Yes  | III |
| Negative symptoms        | Jauhar et al. 2014         | TAU (59%), CR (10%), Unknown** (8%), BF (6%), PE (5%), GFT (3%), SAT (2%), SC (2%), RS (2%), ST (2%), GS (1%)             | 34   | EoT       | 2354        | -0.13 (-0.24; -0.02) | 0.02                    | 51.28              | Null     | No/No/Yes  | IV  |
|                          | Velthorst et al. 2015      | CBT vs TAU (60%), BF (9%), PE (6%), unknown (5%), ETAU (4%), WL (3%), GFSC (3%), E-ST (3%), WL+TAU (3%), SC (2%), ST (2%) | 28   | EoT       | 2067        | 0.12 (-0.03; 0.27)   | 0.13                    | 64.63              | Null     | Yes/No/No  | NS  |
| Delusions                | Turner, Burger et al. 2020 | CBT vs TAU (76%), SC (20%), PE (3%), ET (1%)                                                                              | 27   | EoT       | 2169        | 0.36 (0.22; 0.51)    | 0.15 x 10 <sup>-5</sup> | 50.47              | Null     | Yes/No/No  | III |
| Hallucinations           | Turner, Burger et al. 2021 | CBT vs TAU (72%), SC (24%), PE (3%), WL (1%)                                                                              | 28   | EoT       | 2388        | 0.32 (0.19; 0.46)    | 0.41 x 10 <sup>-5</sup> | 45.14              | Null     | No/No/Yes  | III |
| Functioning and distress | Bighelli et al. 2023       | CBT vs TAU (64%), inactive control (8%), ST (10%), CR (9%), WL (6%), FI (1%), psychodynamic therapy (1%), PE (1%)         | 32   | EoT       | 1328        | 0.24 (0.11; 0.38)    | 0.50 e-03               | 58.18              | Null     | No/No.No   | III |
| Functioning and distress | Bighelli et al. 2023       | CBT vs TAU (64%), inactive control (8%), ST (10%), CR (9%), WL (6%), FI (1%), psychodynamic therapy (1%), PE (1%)         | 30   | EoT       | 2657        | 0.24 (0.11; 0.38)    | 0.50x10 <sup>-3</sup>   | 58.18              | Null     | No/No.No   | III |

|  |  |                                                                                           |    |     |      |  |                   |                       |       |      |          |    |
|--|--|-------------------------------------------------------------------------------------------|----|-----|------|--|-------------------|-----------------------|-------|------|----------|----|
|  |  | CBT vs TAU (61%), CR (14%), ST (9%), medication (5%), SAT (5%), BF (4%), PE (2%), WL (1%) | 26 | EoT | 1704 |  | 0.25 (0.10; 0.40) | $0.76 \times 10^{-3}$ | 54.50 | Null | No/No/No | IV |
|--|--|-------------------------------------------------------------------------------------------|----|-----|------|--|-------------------|-----------------------|-------|------|----------|----|

Abbreviations: PI: prediction interval, SSE: small study effect, ESB: excess significance bias, LS: largest study, CE: class of evidence, RCT: randomized controlled trial, EoT: end of therapy, ES: effect size, CBT: cognitive behavioral therapy, TAU: treatment as usual, PE: psychoeducation, BF: befriending, SC: supportive counseling, SAT: Social Activity Therapy, CR: Cognitive remediation, ST: supportive therapy, GS: group support, GF-SC: Goal-focused supportive contact, RS: Recreation and Support, GFT: goal focused therapy, ETAU: enriched treatment as usual, WL: waiting list, E-ST: enhanced supportive therapy, ET: exposure therapy, FI: family intervention.

\*in some cases the summary estimates from our analysis differed one-hundredth decimal compared to the original findings. We used the data provided by the report of the meta-analysis and expect that variation between estimates adopted from the primary RCTs and estimates provided in the meta-analysis have caused this slight and clinically irrelevant variation

**Supplemental Table 5. The number of times that one randomized trial is included in a meta-analysis**

| Author                 | Year | Follow-up | Times included in a meta-analysis |
|------------------------|------|-----------|-----------------------------------|
| Valmaggia et al.       | 2005 | EoT       | 16                                |
| Durham et al.          | 2003 | EoT       | 14                                |
| Haddock et al.         | 2009 | EoT       | 13                                |
| Cather et al.          | 2005 | EoT       | 11                                |
| Lewis et al.           | 2002 | EoT       | 11                                |
| Bechdolf et al.        | 2004 | EoT       | 10                                |
| Garety et al.          | 2008 | Long      | 10                                |
| Pinto et al.           | 1999 | EoT       | 10                                |
| Startup et al.         | 2004 | EoT       | 10                                |
| Krakovik et al.        | 2013 | EoT       | 9                                 |
| Lincoln et al.         | 2012 | EoT       | 9                                 |
| Morrison et al.        | 2014 | EoT       | 9                                 |
| Barrowclough et al.    | 2006 | EoT       | 8                                 |
| Garety,Carer et al.    | 2008 | EoT       | 8                                 |
| Morrison et al.        | 2018 | EoT       | 8                                 |
| Farhall et al.         | 2009 | EoT       | 7                                 |
| Penn et al.            | 2009 | Long      | 7                                 |
| Garety et al.          | 2008 | EoT       | 6                                 |
| Gaudiano et al.        | 2006 | EoT       | 6                                 |
| Granholm et al.        | 2005 | EoT       | 6                                 |
| Gumley et al.          | 2003 | EoT       | 6                                 |
| Haddock et al.         | 2009 | Long      | 6                                 |
| Penades et al.         | 2006 | EoT       | 6                                 |
| Penn et al.            | 2009 | EoT       | 6                                 |
| Penn et al.            | 2009 | Medium    | 6                                 |
| Rathod et al.          | 2013 | EoT       | 6                                 |
| Rector et al.          | 2003 | EoT       | 6                                 |
| Sensky et al.          | 2000 | EoT       | 6                                 |
| Valmaggia et al.       | 2005 | Medium    | 6                                 |
| Bechdolf et al.        | 2004 | Long      | 5                                 |
| Bechdolf et al.        | 2004 | Medium    | 5                                 |
| Drury et al.           | 1996 | EoT       | 5                                 |
| Garety,No,Carer et al. | 2008 | EoT       | 5                                 |
| Haddock et al.         | 2009 | Short     | 5                                 |
| Jackson et al.         | 2008 | EoT       | 5                                 |
| Lewis et al.           | 2002 | Long      | 5                                 |
| Tarrier et al.         | 2014 | EoT       | 5                                 |
| Vandergaag et al.      | 2011 | EoT       | 5                                 |
| Wykes et al.           | 2005 | EoT       | 5                                 |
| Barrowclough et al.    | 2001 | Medium    | 4                                 |

|                     |      |        |   |
|---------------------|------|--------|---|
| Barrowclough et al. | 2014 | Long   | 4 |
| Durham et al.       | 2003 | Long   | 4 |
| Edwards_Clz et al.  | 2011 | EoT    | 4 |
| Edwards_Tdz et al.  | 2011 | EoT    | 4 |
| Foster et al.       | 2010 | EoT    | 4 |
| Gottlieb et al.     | 2017 | EoT    | 4 |
| Klingberg et al.    | 2011 | EoT    | 4 |
| Lecomte et al.      | 2008 | EoT    | 4 |
| Levine et al.       | 1998 | EoT    | 4 |
| Lewis et al.        | 2002 | Short  | 4 |
| Lewis_L et al.      | 2002 | Long   | 4 |
| Lewis_M et al.      | 2002 | Long   | 4 |
| Lewis_N et al.      | 2002 | Long   | 4 |
| Li et al.           | 2014 | Long   | 4 |
| Li et al.           | 2014 | Medium | 4 |
| Li et al.           | 2015 | Short  | 4 |
| Penn et al.         | 2009 | Short  | 4 |
| Peters et al.       | 2010 | EoT    | 4 |
| Startup et al.      | 2004 | Medium | 4 |
| Tarrier et al.      | 1999 | EoT    | 4 |
| Tarrier et al.      | 1999 | Long   | 4 |
| Trower et al.       | 2004 | EoT    | 4 |
| Valmaggia et al.    | 2005 | Short  | 4 |
| Barretto et al.     | 2009 | EoT    | 3 |
| Barrowclough et al. | 2001 | Long   | 3 |
| Barrowclough et al. | 2010 | Long   | 3 |
| Bechdorf et al.     | 2004 | Short  | 3 |
| Birchwood et al.    | 2014 | EoT    | 3 |
| Bradshaw et al.     | 2000 | EoT    | 3 |
| Farhall et al.      | 2009 | Long   | 3 |
| Fowler et al.       | 2009 | EoT    | 3 |
| Fowler et al.       | 2009 | Long   | 3 |
| Freeman et al.      | 2014 | EoT    | 3 |
| Freeman et al.      | 2015 | EoT    | 3 |
| Granholm et al.     | 2002 | EoT    | 3 |
| Granholm et al.     | 2014 | EoT    | 3 |
| Gumley et al.       | 2003 | Long   | 3 |
| Guo et al.          | 2015 | Long   | 3 |
| Haddock et al.      | 1999 | EoT    | 3 |
| Hall et al.         | 2003 | EoT    | 3 |
| Hall-Tarier et al.  | 2003 | EoT    | 3 |
| Jackson et al.      | 2008 | Long   | 3 |
| Jolley et al.       | 2003 | EoT    | 3 |
| Leclerc et al.      | 2000 | EoT    | 3 |

|                     |      |          |   |
|---------------------|------|----------|---|
| Li et al.           | 2014 | Short    | 3 |
| Li et al.           | 2015 | EoT      | 3 |
| McLeod et al.       | 2007 | EoT      | 3 |
| Naeem et al.        | 2016 | EoT      | 3 |
| Naeem et al.        | 2016 | EoT      | 3 |
| Pinninti et al.     | 2010 | EoT      | 3 |
| Rathod et al.       | 2012 | EoT      | 3 |
| Shawyer et al.      | 2012 | EoT      | 3 |
| Tarrier et al.      | 2014 | Medium   | 3 |
| Waller et al.       | 2015 | EoT      | 3 |
| Wang et al.         | 2003 | EoT      | 3 |
| Barretto et al.     | 2009 | Medium   | 2 |
| Barrowclough et al. | 2006 | Medium   | 2 |
| Barrowclough et al. | 2010 | Medium   | 2 |
| Cather et al.       | 2005 | Short    | 2 |
| Daniels et al.      | 1998 | EoT      | 2 |
| Drury et al.        | 2000 | Long     | 2 |
| Durham et al.       | 2003 | Medium   | 2 |
| Gleeson et al.      | 2009 | Medium   | 2 |
| Granhholm et al.    | 2005 | Long     | 2 |
| Granhholm et al.    | 2005 | Medium   | 2 |
| Granhholm et al.    | 2012 | EoT      | 2 |
| Granhholm et al.    | 2013 | EoT      | 2 |
| Granhholm et al.    | 2013 | Long     | 2 |
| Grawe et al.        | 2006 | Long     | 2 |
| Habib et al.        | 2015 | EoT      | 2 |
| Husain et al.       | 2017 | EoT      | 2 |
| Kingsep et al.      | 2003 | EoT      | 2 |
| Kuipers et al.      | 1997 | EoT      | 2 |
| Leff et al.         | 2013 | EoT      | 2 |
| Levine et al.       | 1998 | Short    | 2 |
| Morrison et al.     | 2018 | Medium   | 2 |
| Naeem et al.        | 2015 | EoT      | 2 |
| Odonnel et al.      | 2003 | Long     | 2 |
| Pan et al.          | 2012 | Short    | 2 |
| Qiu et al.          | 2014 | Medium   | 2 |
| Sensky et al.       | 2000 | Long     | 2 |
| Startup et al.      | 2004 | Long     | 2 |
| Steel et al.        | 2017 | EoT      | 2 |
| Tarrier et al.      | 1998 | EoT      | 2 |
| Valmaggia et al.    | 2005 | FollowUp | 2 |
| Wang et al.         | 2015 | Long     | 2 |
| White et al.        | 2011 | EoT      | 2 |
| Wong et al.         | 2019 | EoT      | 2 |

|                     |      |          |   |
|---------------------|------|----------|---|
| Zhang et al.        | 1999 | EoT      | 2 |
| Baker et al.        | 2006 | EoT      | 1 |
| Baker et al.        | 2006 | Long     | 1 |
| Baker et al.        | 2006 | Medium   | 1 |
| Barretto et al.     | 2009 | FollowUp | 1 |
| Barrowclough et al. | 2001 | EoT      | 1 |
| Barrowclough et al. | 2006 | Long     | 1 |
| Barrowclough et al. | 2014 | Medium   | 1 |
| Bechdolf et al.     | 2010 | EoT      | 1 |
| Birchwood et al.    | 2014 | Long     | 1 |
| Birchwood et al.    | 2014 | Medium   | 1 |
| Buchkremer et al.   | 1997 | Long     | 1 |
| Buchkremer et al.   | 1997 | Medium   | 1 |
| Cao et al.          | 2014 | Long     | 1 |
| Chen et al.         | 2015 | Medium   | 1 |
| Chen et al.         | 2015 | Short    | 1 |
| Craig et al.        | 2017 | EoT      | 1 |
| Deng et al.         | 2008 | EoT      | 1 |
| Durham et al.       | 2003 | Short    | 1 |
| Durham_A et al.     | 2003 | EoT      | 1 |
| Durham_B et al.     | 2003 | EoT      | 1 |
| Edwards et al.      | 2011 | Short    | 1 |
| Edwards_Clz et al.  | 2011 | Long     | 1 |
| Edwards_Tdz et al.  | 2011 | Long     | 1 |
| England et al.      | 2007 | Long     | 1 |
| England et al.      | 2007 | Short    | 1 |
| England et al.      | 2008 | EoT      | 1 |
| Foster et al.       | 2010 | Medium   | 1 |
| Freeman et al.      | 2014 | Medium   | 1 |
| Freeman et al.      | 2015 | Medium   | 1 |
| Freeman et al.      | 2015 | Short    | 1 |
| Freeman et al.      | 2016 | EoT      | 1 |
| Freeman_A et al.    | 2015 | EoT      | 1 |
| Freeman_B et al.    | 2015 | EoT      | 1 |
| Freeman_C et al.    | 2014 | EoT      | 1 |
| Freeman_S et al.    | 2014 | EoT      | 1 |
| Garety et al.       | 2008 | Medium   | 1 |
| Garety et al.       | 2008 | Short    | 1 |
| Granholtm et al.    | 2013 | Medium   | 1 |
| Granholtm et al.    | 2013 | Short    | 1 |
| Granholtm et al.    | 2014 | Long     | 1 |
| Granholtm et al.    | 2014 | Medium   | 1 |
| Granholtm et al.    | 2014 | Short    | 1 |
| Granholtm et al.    | 2020 | EoT      | 1 |



|                  |      |          |   |
|------------------|------|----------|---|
| Grant et al.     | 2011 | EoT      | 1 |
| Grant et al.     | 2012 | EoT      | 1 |
| Guo et al.       | 2015 | Medium   | 1 |
| Guo et al.       | 2015 | Short    | 1 |
| Haddock et al.   | 1999 | Long     | 1 |
| Haddock et al.   | 1999 | Short    | 1 |
| Hall et al.      | 2003 | Long     | 1 |
| Hall et al.      | 2003 | Medium   | 1 |
| Halperin et al.  | 2000 | EoT      | 1 |
| Hayward et al.   | 2017 | EoT      | 1 |
| Hazell et al.    | 2017 | EoT      | 1 |
| Hjorthoj et al.  | 2013 | EoT      | 1 |
| Hogarty et al.   | 1997 | Long     | 1 |
| Hu et al.        | 2013 | Medium   | 1 |
| Jackson et al.   | 2007 | EoT      | 1 |
| Jia et al.       | 2005 | Short    | 1 |
| Jiao et al.      | 2014 | Short    | 1 |
| Kemp et al.      | 1998 | Long     | 1 |
| Kemp et al.      | 1998 | Short    | 1 |
| Klingberg et al. | 2012 | Long     | 1 |
| Kuipers et al.   | 1997 | Long     | 1 |
| Kuipers et al.   | 1997 | Medium   | 1 |
| Lecomte et al.   | 2008 | Medium   | 1 |
| Lecomte et al.   | 2008 | Short    | 1 |
| Lecomte_A et al. | 2008 | EoT      | 1 |
| Lecomte_B et al. | 2008 | EoT      | 1 |
| Lee et al.       | 2012 | EoT      | 1 |
| Lee et al.       | 2013 | EoT      | 1 |
| Lewis et al.     | 2002 | Medium   | 1 |
| Li et al.        | 2013 | Short    | 1 |
| Li et al.        | 2014 | EoT      | 1 |
| Ma et al.        | 2016 | Short    | 1 |
| Madigan et al.   | 2013 | EoT      | 1 |
| Madigan et al.   | 2013 | Long     | 1 |
| Morrison et al.  | 2014 | Long     | 1 |
| Morrison et al.  | 2014 | Medium   | 1 |
| Morrison et al.  | 2018 | FollowUp | 1 |
| Morrison et al.  | 2018 | Long     | 1 |
| Pan et al.       | 2012 | Long     | 1 |
| Pan et al.       | 2012 | Medium   | 1 |
| Panninti et al.  | 2010 | EoT      | 1 |
| Panninti et al.  | 2010 | Medium   | 1 |
| Penades et al.   | 2006 | Long     | 1 |
| Penn et al.      | 2015 | EoT      | 1 |

|                   |      |        |   |
|-------------------|------|--------|---|
| Peters et al.     | 2010 | Medium | 1 |
| Pos et al.        | 2019 | EoT    | 1 |
| Pot-Kolder et al. | 2016 | EoT    | 1 |
| Potkolder et al.  | 2018 | EoT    | 1 |
| Qjan et al.       | 2012 | Long   | 1 |
| Qiu et al.        | 2014 | Short  | 1 |
| Rathod et al.     | 2013 | Medium | 1 |
| Rector et al.     | 2003 | Medium | 1 |
| Shawyer et al.    | 2012 | Medium | 1 |
| Startup et al.    | 2005 | EoT    | 1 |
| Steel et al.      | 2017 | Long   | 1 |
| Sun et al.        | 2014 | Short  | 1 |
| Tarrier et al.    | 1993 | EoT    | 1 |
| Tarrier et al.    | 1999 | Short  | 1 |
| Tarrier et al.    | 2004 | EoT    | 1 |
| Tarrier et al.    | 2004 | Long   | 1 |
| Tarrier et al.    | 2014 | Long   | 1 |
| Tarrier_A et al.  | 1998 | EoT    | 1 |
| Tarrier_B et al.  | 1998 | EoT    | 1 |
| Turkington et al. | 2000 | EoT    | 1 |
| Turkington et al. | 2002 | EoT    | 1 |
| Turkington et al. | 2002 | Medium | 1 |
| Turkington et al. | 2006 | Medium | 1 |
| Valmaggia et al.  | 2005 | Long   | 1 |
| Valmaggia et al.  | 2006 | EoT    | 1 |
| Velligan et al.   | 2014 | EoT    | 1 |
| Waller et al.     | 2015 | Medium | 1 |
| Waller et al.     | 2018 | EoT    | 1 |
| Wang et al.       | 2005 | Short  | 1 |
| Wang et al.       | 2008 | Short  | 1 |
| Wang et al.       | 2015 | Medium | 1 |
| Wang et al.       | 2015 | Short  | 1 |
| Wu et al.         | 2008 | EoT    | 1 |
| Zhao et al.       | 2013 | Short  | 1 |
| Zhao et al.       | 2014 | Short  | 1 |

**Supplemental figures 1-34. Forest plots for each outcome per follow-up assessment.**

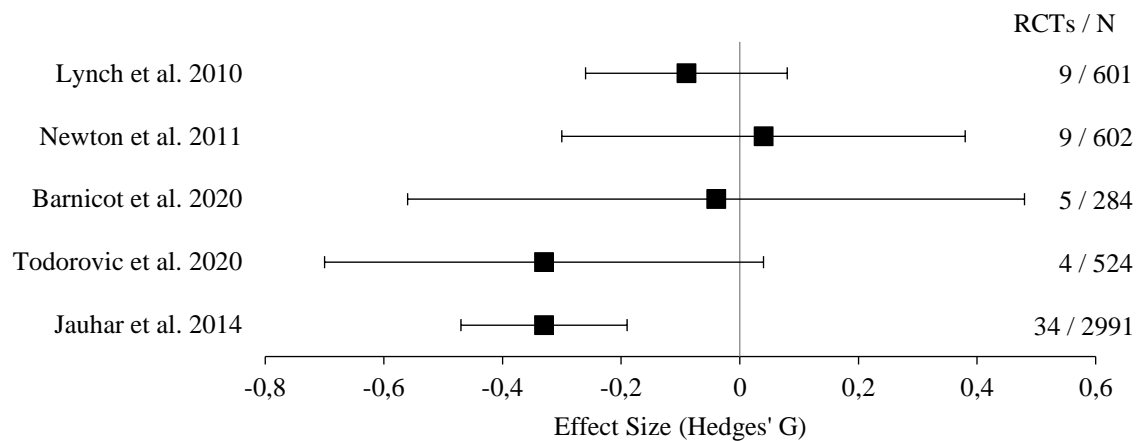

Figure 1. General psychopathology, end of therapy, randomized controlled trials (RCTs) and total sample size (N).

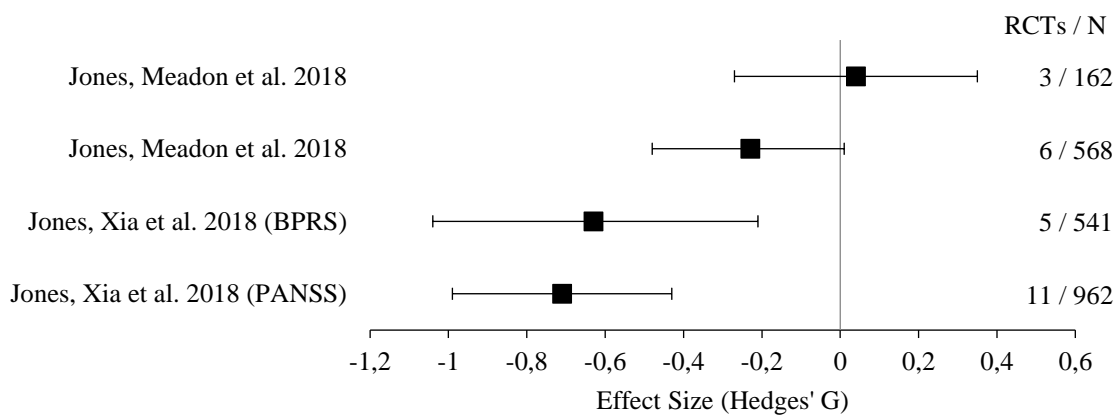

Figure 2. General psychopathology, follow-up of 0-6 months, randomized controlled trials (RCTs) and total sample size (N).

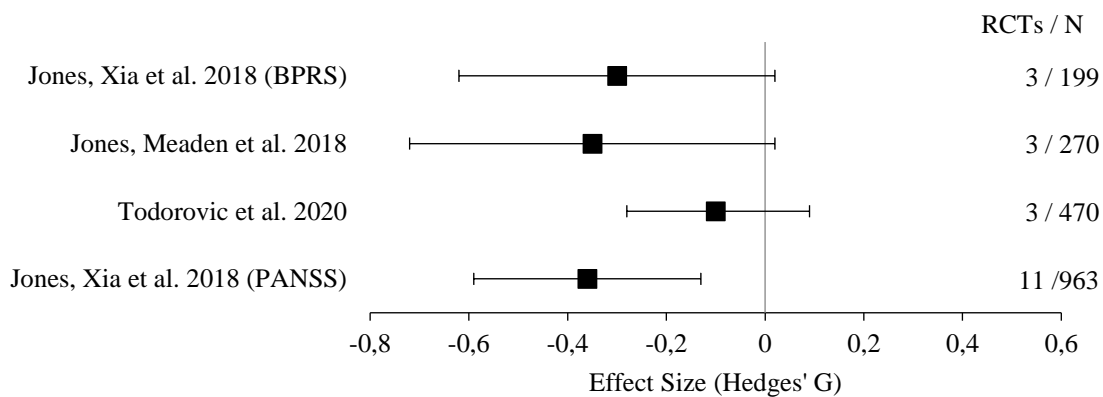

Figure 3. General psychopathology, follow-up 6-12 months, randomized controlled trials (RCTs) and total sample size (N).

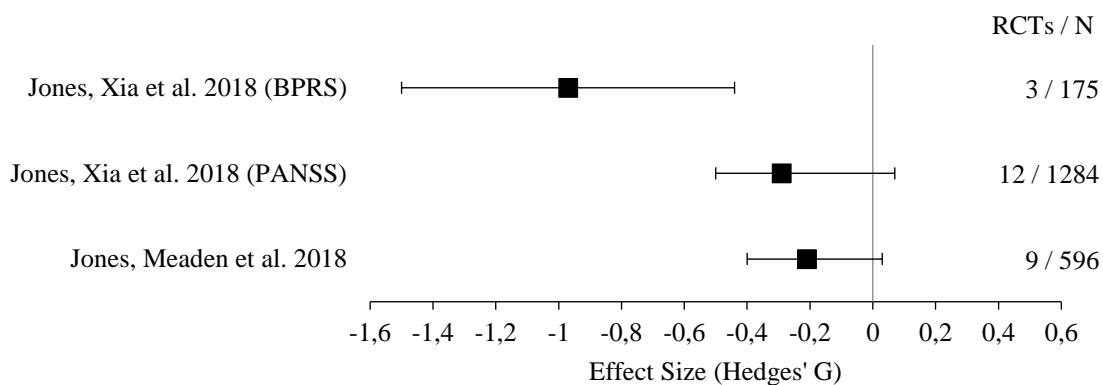

Figure 4. General psychopathology, follow-up more than 12 months, randomized controlled trials (RCTs) and total sample size (N).

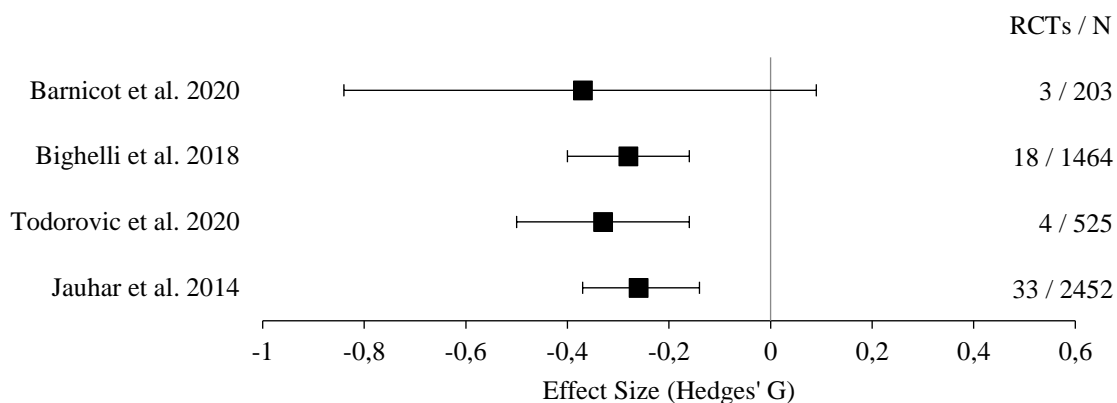

Figure 5. Positive symptoms, end of therapy, randomized controlled trials (RCTs) and total sample size (N).

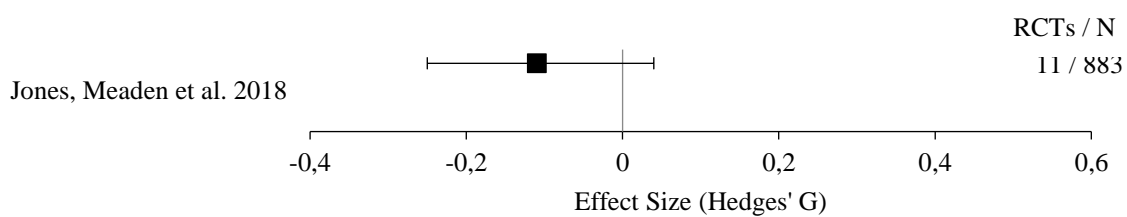

Figure 6. Positive symptoms, follow-up 0-6 months, randomized controlled trials (RCTs) and total sample size (N).

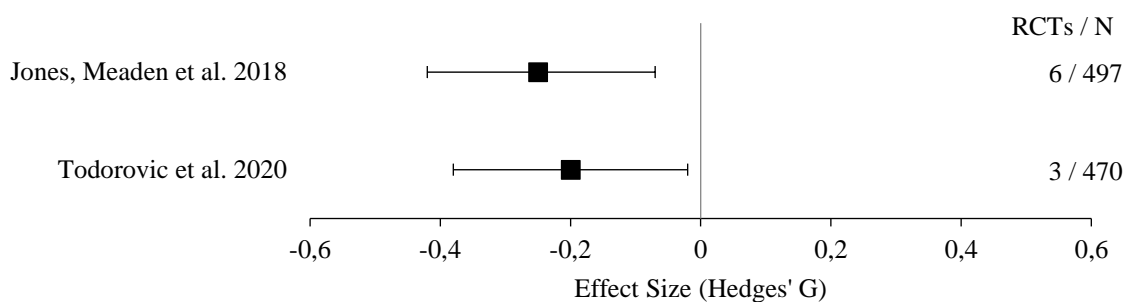

Figure 7. Positive symptoms, follow-up 6-12 months, randomized controlled trials (RCTs) and total sample size (N).

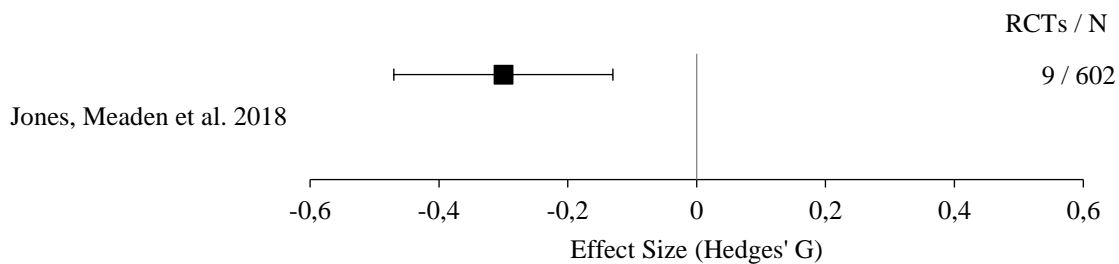

Figure 8. Positive symptoms, follow-up more than 12 months, randomized controlled trials (RCTs) and total sample size (N).

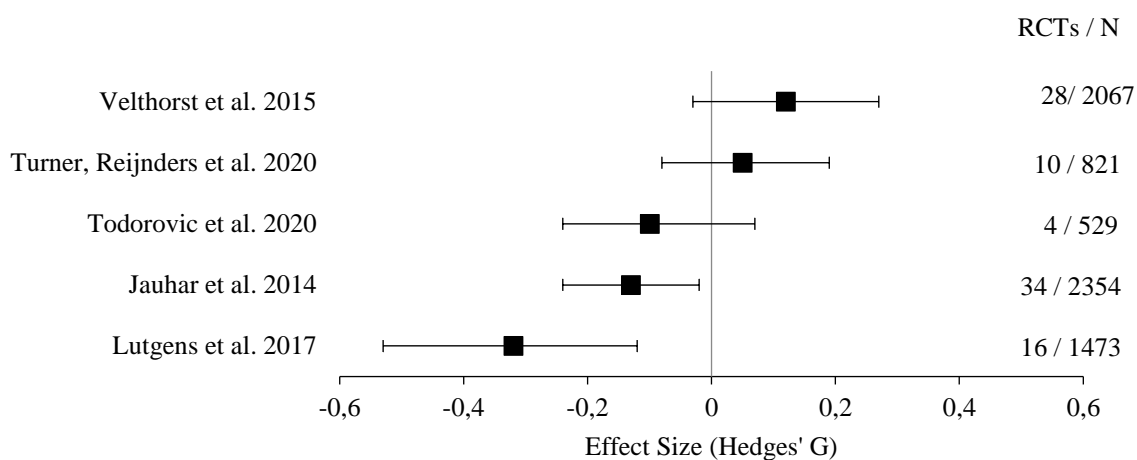

Figure 9. Negative symptoms, end of therapy, randomized controlled trials (RCTs) and total sample size (N).

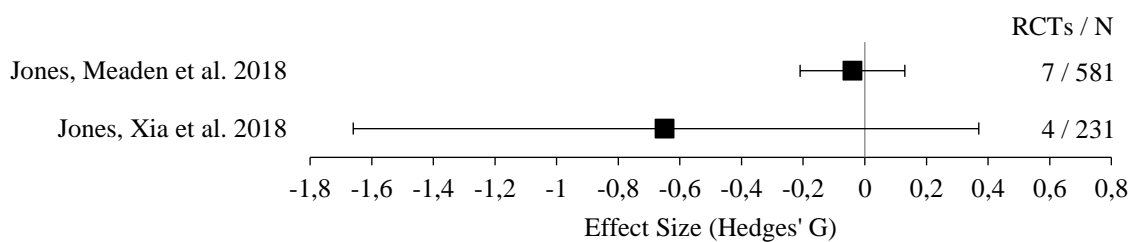

Figure 10. Negative symptoms, follow-up of 0-6 months, randomized controlled trials (RCTs) and total sample size (N).

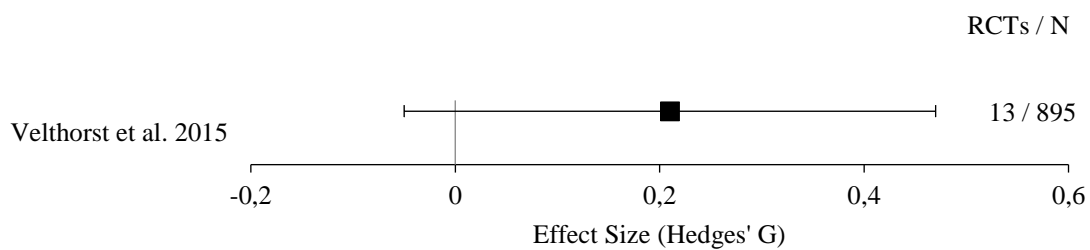

Figure 11. Negative symptoms, follow-up of 3-6 months, randomized controlled trials (RCTs) and total sample size (N).

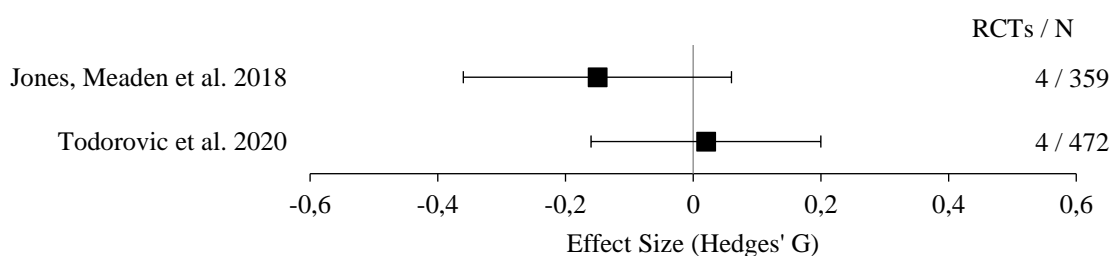

Figure 12. Negative symptoms, follow-up of 6-12 months, randomized controlled trials (RCTs) and total sample size (N).

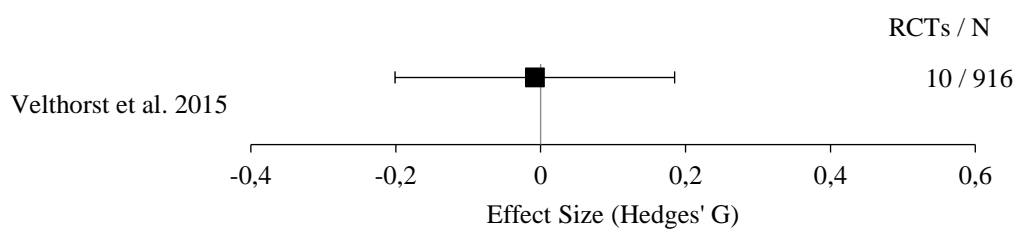

Figure 13. Negative symptoms, follow-up of 9-12 months, randomized controlled trials (RCTs) and total sample size (N).

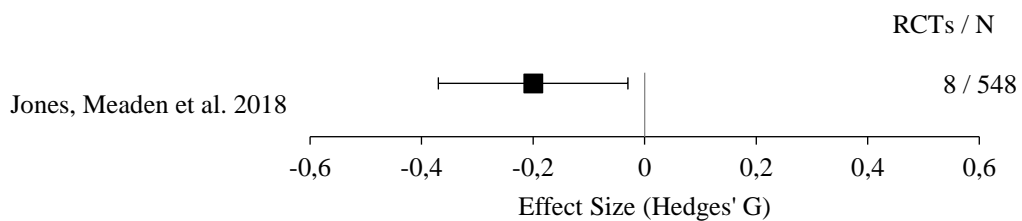

Figure 14. Negative symptoms, follow-up of more than 12 months, randomized controlled trials (RCTs) and total sample size (N).

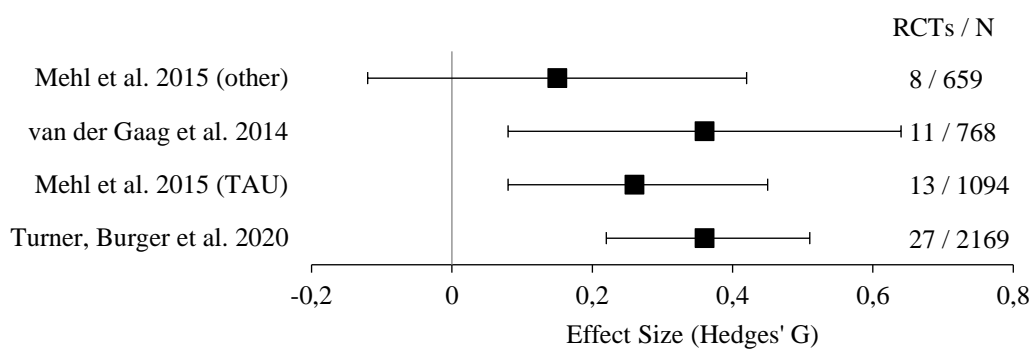

Figure 15. Delusions, end of therapy, randomized controlled trials (RCTs) and total sample size (N).

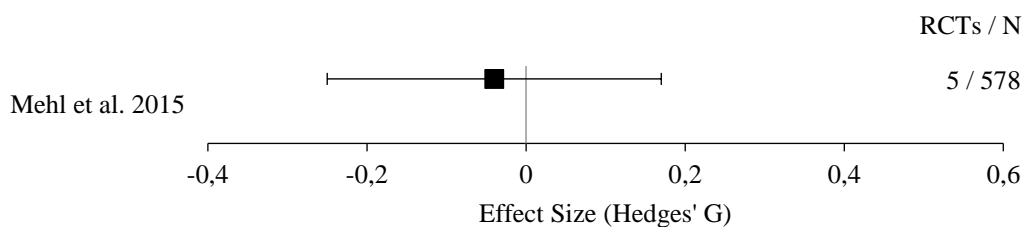

Figure 16. Delusions, follow-up less than 9 months, randomized controlled trials (RCTs) and total sample size (N).



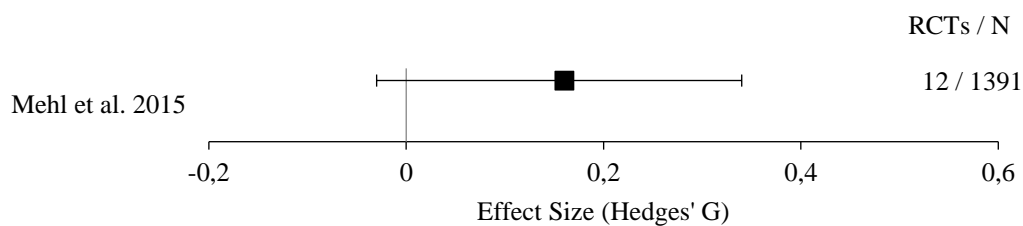

Figure 17. Delusions, follow-up more than 12 months, randomized controlled trials (RCTs) and total sample size (N).

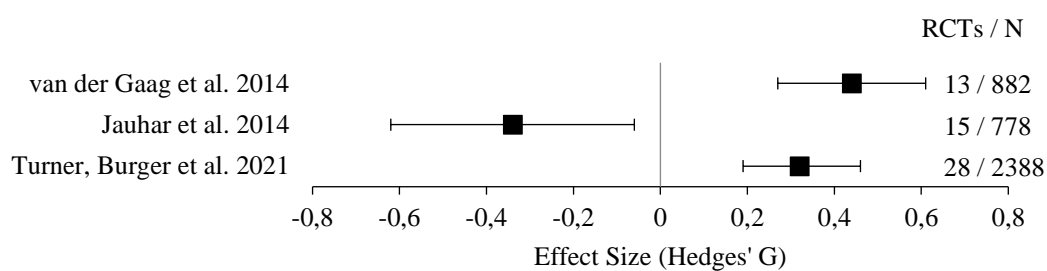

Figure 18. Hallucinations, end of therapy, randomized controlled trials (RCTs) and total sample size (N).

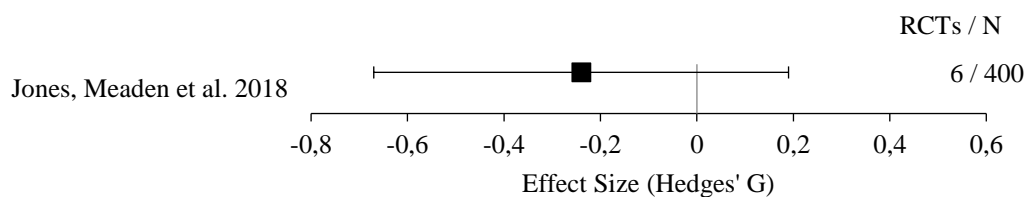

Figure 19. Affective symptoms, follow-up of 0-6 months, randomized controlled trials (RCTs) and total sample size (N).

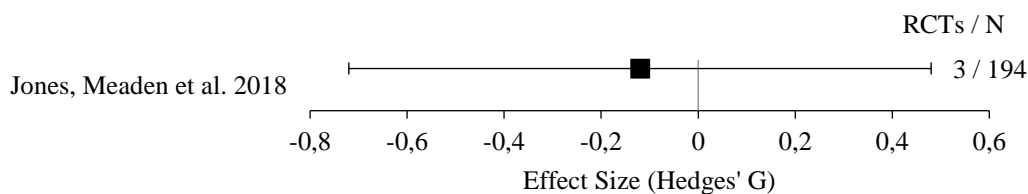

Figure 21. Affective symptoms, follow-up of 6-12 months, randomized controlled trials (RCTs) and total sample size (N).

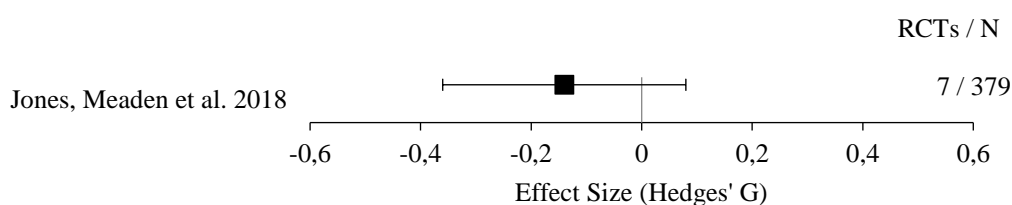

Figure 22. Affective symptoms, follow-up more than 12 months, randomized controlled trials (RCTs) and total sample size (N).

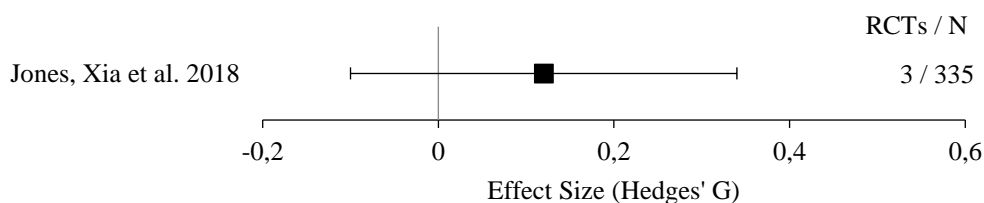

Figure 23. Anxiety, follow-up more than 12 months, randomized controlled trials (RCTs) and total sample size (N).

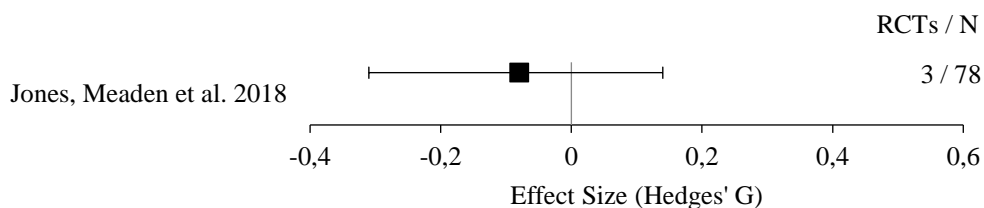

Figure 24. Rehospitalisation, follow-up of 6-12 months, randomized controlled trials (RCTs) and total sample size (N).

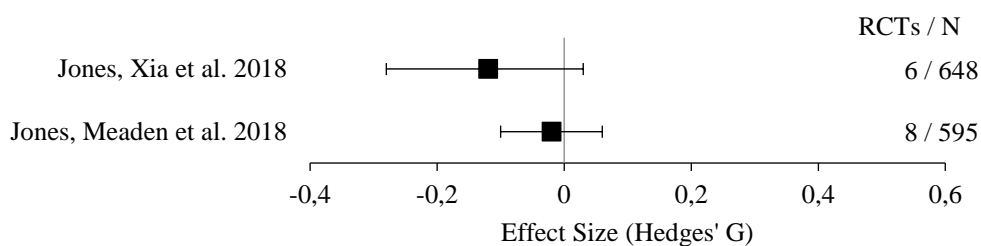

Figure 25. Rehospitalisation, follow-up of more than 12 months, randomized controlled trials (RCTs) and total sample size (N).

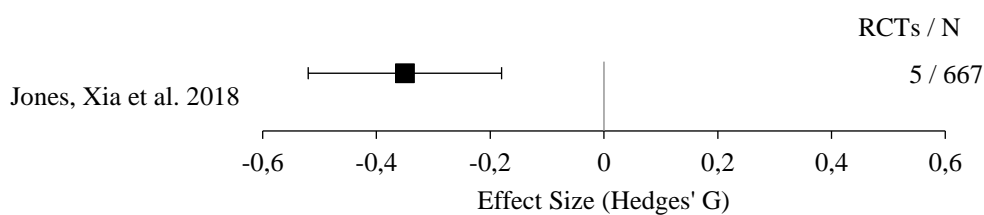

Figure 26. Relapse, follow-up of 6-12 months, randomized controlled trials (RCTs) and total sample size (N).

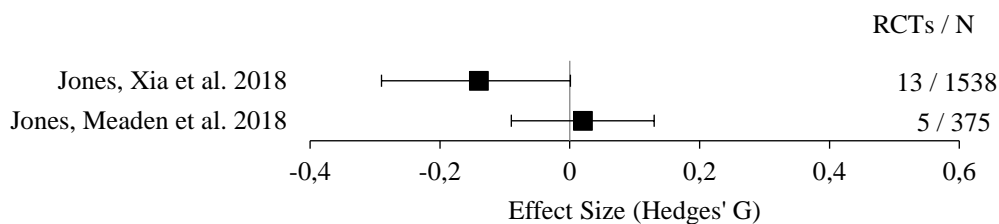

Figure 27. Relapse, follow-up of more than 12 months, randomized controlled trials (RCTs) and total sample size (N).

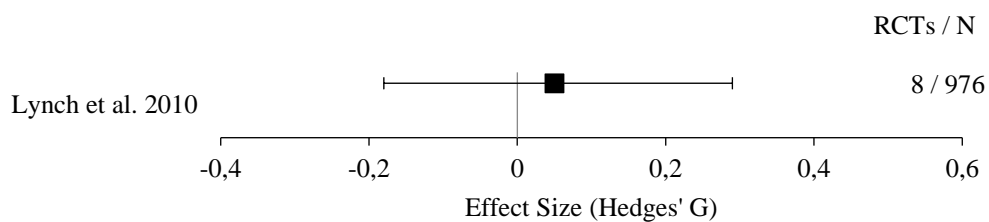

Figure 28. Relapse, follow-up of 6-36 months, randomized controlled trials (RCTs) and total sample size (N).

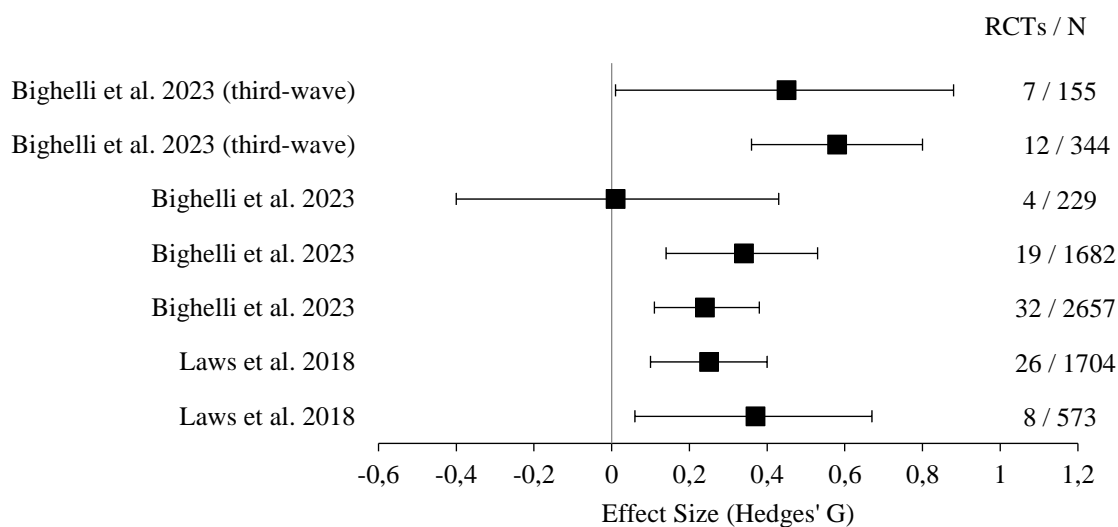

Figure 29. Functioning and distress, end of therapy, randomized controlled trials (RCTs) and total sample size (N).

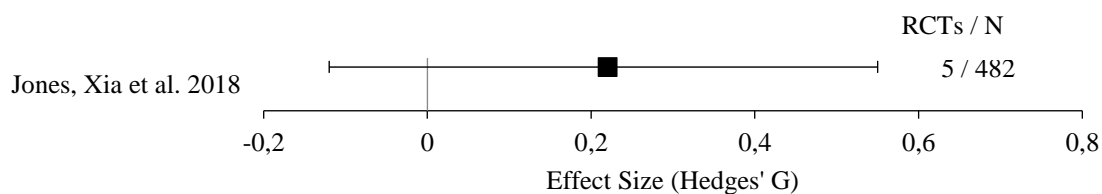

Figure 30. Functioning and distress, 0-6 months, randomized controlled trials (RCTs) and total sample size (N).

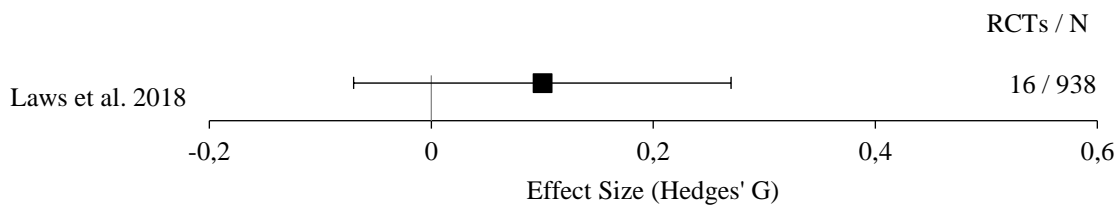

Figure 31. Functioning and distress, 3-18 months, randomized controlled trials (RCTs) and total sample size (N).

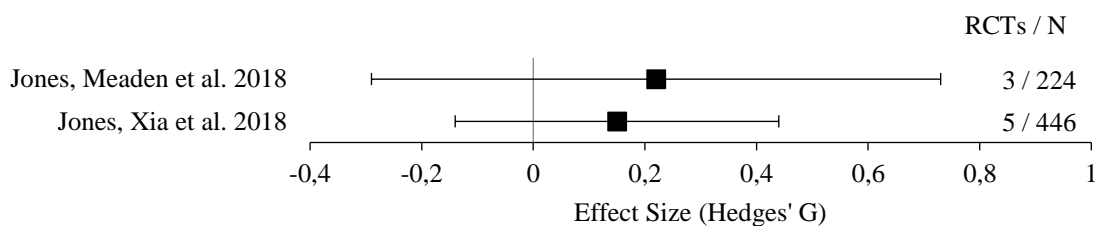

Figure 32. Functioning and distress, more than 12 months, randomized controlled trials (RCTs) and total sample size (N).

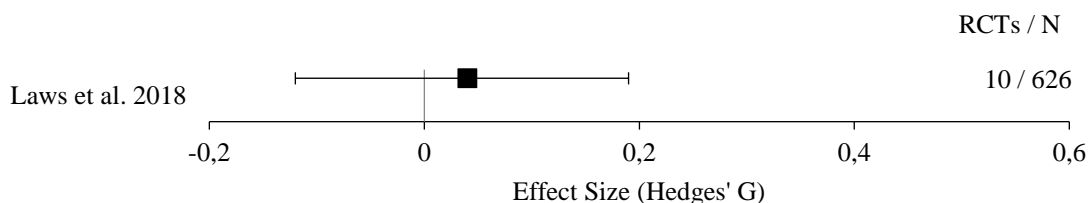

Figure 33. Quality of life, end of therapy, randomized controlled trials (RCTs) and total sample size (N).

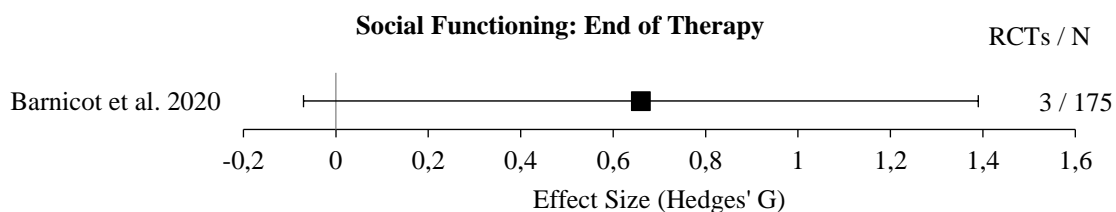

Figure 34. Social functioning, end of therapy, randomized controlled trials (RCTs) and total sample size (N).
